# Supplementary material for: Sterblichkeit bei Sepsis und septischem Schock in Deutschland. Ergebnisse eines systematischen Reviews mit Metaanalyse
Source: Springer Nature journal article supplement (doi:10.1007/s00101-021-00917-8), 2021-02-09
Supplement: MOESM1 [file 18848524]

Zusatzmaterial zum Beitrag „Sterblichkeit bei Sepsis und septischem Schock in Deutschland. Ergebnisse eines systematischen Reviews mit Meta-Analyse“ von Bauer M, Groesdonk HV, Preissing F et al. (2021) in *Der Anaesthesist*.

Beitrag und Zusatzmaterial stehen Ihnen auf [www.springermedizin.de](http://www.springermedizin.de) zur Verfügung. Bitte geben Sie dort den Beitragstitel in die Suche ein.

**Tabelle** - Synopse der eingeschlossenen Studien für Deutschland

|   | Autor, Jahr      | Titel                                                                                                                                                               | Studientyp                   | Patientenzahl | Betrachteter Endpunkt                                                                                                                            |
|---|------------------|---------------------------------------------------------------------------------------------------------------------------------------------------------------------|------------------------------|---------------|--------------------------------------------------------------------------------------------------------------------------------------------------|
| 1 | Behnes, 2014     | Diagnostic and prognostic utility of soluble CD 14 subtype (presepsin) for severe sepsis and septic shock during the first week of intensive care treatment.        | Retrospektive Kohortenstudie | 74            | 30-Tages-Sterblichkeit septischer Schock                                                                                                         |
| 2 | Bloos, 2014      | Impact of compliance with infection management guidelines on outcome in patients with severe sepsis: a prospective observational multi-center study.                | Prospektive Kohortenstudie   | 1.011         | 30-Tages-Sterblichkeit septischer Schock                                                                                                         |
| 3 | Bloos, 2016      | Effect of Sodium Selenite Administration and Procalcitonin-Guided Therapy on Mortality in Patients With Severe Sepsis or Septic Shock: A Randomized Clinical Trial. | RCT                          | 1.089         | <ul style="list-style-type: none"> <li>▪ 30-Tages-Sterblichkeit septischer Schock</li> <li>▪ 90-Tages-Sterblichkeit septischer Schock</li> </ul> |
| 4 | Bloos, 2017      | Effect of a multifaceted educational intervention for anti-infectious measures on sepsis mortality: a cluster randomized trial.                                     | RCT                          | 4.183         | 30-Tages-Sterblichkeit septischer Schock                                                                                                         |
| 5 | Brunkhorst, 2012 | Effect of empirical treatment with moxifloxacin and meropenem vs                                                                                                    | RCT                          | 551           | <ul style="list-style-type: none"> <li>▪ 30-Tages-Sterblichkeit septischer Schock</li> </ul>                                                     |

|    |                 |                                                                                                                                                                                         |                              |     |                                                                                                                            |
|----|-----------------|-----------------------------------------------------------------------------------------------------------------------------------------------------------------------------------------|------------------------------|-----|----------------------------------------------------------------------------------------------------------------------------|
|    |                 | meropenem on sepsis-related organ dysfunction in patients with severe sepsis: a randomized trial.                                                                                       |                              |     | <ul style="list-style-type: none"> <li>▪ 90-Tages-Sterblichkeit septischer Schock</li> </ul>                               |
| 6  | Elke, 2013      | Enteral nutrition is associated with improved outcome in patients with severe sepsis. A secondary analysis of the VISEP trial.                                                          | Retrospektive Kohortenstudie | 353 | <ul style="list-style-type: none"> <li>▪ 30-Tages-Sterblichkeit Sepsis</li> <li>▪ 90-Tages-Sterblichkeit Sepsis</li> </ul> |
| 7  | Kaffarnik, 2013 | Early diagnosis of sepsis-related hepatic dysfunction and its prognostic impact on survival: a prospective study with the LiMAX test.                                                   | Prospektive Kohortenstudie   | 28  | 90-Tages-Sterblichkeit Sepsis                                                                                              |
| 8  | Keh, 2016       | Effect of Hydrocortisone on Development of Shock Among Patients With Severe Sepsis: The HYPRESS Randomized Clinical Trial.                                                              | RCT                          | 353 | <ul style="list-style-type: none"> <li>▪ 30-Tages-Sterblichkeit Sepsis</li> <li>▪ 90-Tages-Sterblichkeit Sepsis</li> </ul> |
| 9  | Koch, 2010      | Regulation and prognostic relevance of serum ghrelin concentrations in critical illness and sepsis.                                                                                     | Prospektive Kohortenstudie   | 122 | <ul style="list-style-type: none"> <li>▪ 30-Tages-Sterblichkeit Sepsis</li> <li>▪ 90-Tages-Sterblichkeit Sepsis</li> </ul> |
| 10 | Kristof, 2018   | Anaemia requiring red blood cell transfusion is associated with unfavourable 90-day survival in surgical patients with sepsis.                                                          | Prospektive Kohortenstudie   | 435 | <ul style="list-style-type: none"> <li>▪ 30-Tages-Sterblichkeit Sepsis</li> <li>▪ 90-Tages-Sterblichkeit Sepsis</li> </ul> |
| 11 | Mansur, 2015    | Impact of statin therapy on mortality in patients with sepsis-associated acute respiratory distress syndrome (ARDS) depends on ARDS severity: a prospective observational cohort study. | Prospektive Kohortenstudie   | 404 | <ul style="list-style-type: none"> <li>▪ 30-Tages-Sterblichkeit Sepsis</li> </ul>                                          |
| 12 | Mansur, 2015    | Primary bacteraemia is associated with a higher mortality risk compared with pulmonary and                                                                                              | Prospektive Kohortenstudie   | 327 | <ul style="list-style-type: none"> <li>▪ 30-Tages-Sterblichkeit Sepsis</li> </ul>                                          |

|    |                |                                                                                                                                            |                            |       |                                                                                                                                                  |
|----|----------------|--------------------------------------------------------------------------------------------------------------------------------------------|----------------------------|-------|--------------------------------------------------------------------------------------------------------------------------------------------------|
|    |                | intra-abdominal infections in patients with sepsis: a prospective observational cohort study.                                              |                            |       | <ul style="list-style-type: none"> <li>▪ 90-Tages-Sterblichkeit Sepsis</li> </ul>                                                                |
| 13 | Schädler, 2017 | The effect of a novel extracorporeal cytokine hemoabsorption device on IL-6 elimination in septic patients: A randomized controlled trial. | RCT                        | 97    | <ul style="list-style-type: none"> <li>▪ 90-Tages-Sterblichkeit septischer Schock</li> </ul>                                                     |
| 14 | Scheer, 2017   | Quality Improvement Initiative for Severe Sepsis and Septic Shock Reduces 90-Day Mortality: A 7.5-Year Observational Study.                | Prospektive Kohortenstudie | 1.373 | <ul style="list-style-type: none"> <li>▪ 30-Tages-Sterblichkeit septischer Schock</li> <li>▪ 90-Tages-Sterblichkeit septischer Schock</li> </ul> |
| 15 | Simon, 2017    | Plasma adrenomedullin in critically ill patients with sepsis after major surgery: A pilot study.                                           | Prospektive Kohortenstudie | 34    | <ul style="list-style-type: none"> <li>▪ 30-Tages-Sterblichkeit septischer Schock</li> <li>▪ 90-Tages-Sterblichkeit septischer Schock</li> </ul> |
