# Supplementary material for: Sterblichkeit bei Sepsis und septischem Schock in Deutschland. Ergebnisse eines systematischen Reviews mit Metaanalyse
Source: Springer Nature journal article supplement (doi:10.1007/s00101-021-00917-8), 2021-02-09
Supplement: MOESM2 [file 18848524]

Zusatzmaterial zum Beitrag „Sterblichkeit bei Sepsis und septischem Schock in Deutschland. Ergebnisse eines systematischen Reviews mit Meta-Analyse“ von Bauer M, Groesdonk HV, Preissing F et al. (2021) in *Der Anaesthetist*.

Beitrag und Zusatzmaterial stehen Ihnen auf [www.springermedizin.de](http://www.springermedizin.de) zur Verfügung. Bitte geben Sie dort den Beitragstitel in die Suche ein.

## **Zusammenstellung:** Risk of Bias Assessment der eingeschlossenen Studien für Deutschland

### Inhalt

|                       |     |
|-----------------------|-----|
| Behnes, 2014.....     | 2   |
| Bloos, 2014.....      | 10  |
| Bloos, 2016.....      | 18  |
| Bloos, 2017.....      | 29  |
| Brunkhorst, 2012..... | 39  |
| Elke, 2013.....       | 48  |
| Kaffarnik, 2013.....  | 56  |
| Keh, 2016.....        | 66  |
| Koch, 2010.....       | 75  |
| Kristof, 2018.....    | 85  |
| Mansur, 2015a.....    | 95  |
| Mansur, 2015b.....    | 105 |
| Schädler, 2017.....   | 115 |
| Scheer, 2017.....     | 124 |
| Simon, 2017.....      | 134 |

## Behnes, 2014

Responses underlined in green are potential markers for low risk of bias, and responses in **red** are potential markers for a risk of bias. Where questions relate only to sign posts to other questions, no formatting is used.

| Signalling questions                                                                                                                                                                                                                                                                                                                                                       | Description | Response options              |
|----------------------------------------------------------------------------------------------------------------------------------------------------------------------------------------------------------------------------------------------------------------------------------------------------------------------------------------------------------------------------|-------------|-------------------------------|
| <b>Bias due to confounding</b>                                                                                                                                                                                                                                                                                                                                             |             |                               |
| <p>1.1 Is there potential for confounding of the effect of intervention in this study?</p> <p><b>If <u>N/PN</u> to 1.1:</b> the study can be considered to be at low risk of bias due to confounding and no further signalling questions need be considered</p> <p><b>If <b>Y/PY</b> to 1.1:</b> determine whether there is a need to assess time-varying confounding:</p> | PY          | <b>Y / PY / <u>PN / N</u></b> |
| <p>1.2. Was the analysis based on splitting participants' follow up time according to intervention received?</p> <p><b>If <b>N/PN</b>,</b> answer questions relating to baseline confounding (1.4 to 1.6)</p> <p><b>If <b>Y/PY</b>,</b> go to question 1.3.</p>                                                                                                            | N           | NA / Y / PY / PN / N / NI     |
| <p>1.3. Were intervention discontinuations or switches likely to be related to factors that are prognostic for the outcome?</p> <p><b>If <b>N/PN</b>,</b> answer questions relating to baseline confounding (1.4 to 1.6)</p> <p><b>If <b>Y/PY</b>,</b> answer questions relating to both baseline and time-varying confounding (1.7 and 1.8)</p>                           |             | NA / Y / PY / PN / N / NI     |

| <b>Questions relating to baseline confounding only</b>                                                                                                       |                 |                                                                       |
|--------------------------------------------------------------------------------------------------------------------------------------------------------------|-----------------|-----------------------------------------------------------------------|
| 1.4. Did the authors use an appropriate analysis method that controlled for all the important confounding domains?                                           | PY              | NA / <u>Y</u> / <u>PY</u> /<br>PN / N / NI                            |
| 1.5. <b>If <u>Y/PY</u> to 1.4:</b> Were confounding domains that were controlled for measured validly and reliably by the variables available in this study? | Y               | NA / <u>Y</u> / <u>PY</u> /<br>PN / N / NI                            |
| 1.6. Did the authors control for any post-intervention variables that could have been affected by the intervention?                                          | Y               | NA / <u>Y</u> / <u>PY</u> /<br><u>PN</u> / N / NI                     |
| <b>Questions relating to baseline and time-varying confounding</b>                                                                                           |                 |                                                                       |
| 1.7. Did the authors use an appropriate analysis method that controlled for all the important confounding domains and for time-varying confounding?          | PY              | NA / <u>Y</u> / <u>PY</u> /<br>PN / N / NI                            |
| 1.8. <b>If <u>Y/PY</u> to 1.7:</b> Were confounding domains that were controlled for measured validly and reliably by the variables available in this study? | Y               | NA / <u>Y</u> / <u>PY</u> /<br>PN / N / NI                            |
| <b>Risk of bias judgement</b>                                                                                                                                | Low to Moderate | Low /<br>Moderate /<br>Serious /<br>Critical / NI                     |
| Optional: What is the predicted direction of bias due to confounding?                                                                                        |                 | Favours<br>experimental /<br>Favours<br>comparator /<br>Unpredictable |

**Bias in selection of participants into the study**

|                                                                                                                                                                    |          |                                                                                                  |
|--------------------------------------------------------------------------------------------------------------------------------------------------------------------|----------|--------------------------------------------------------------------------------------------------|
| <p>2.1. Was selection of participants into the study (or into the analysis) based on participant characteristics observed after the start of intervention?</p>     | Y        | <p>Y / PY / <u>PN</u> / <u>N</u> / NI</p>                                                        |
| <p><b>If <u>N/PN</u> to 2.1:</b> go to 2.4</p>                                                                                                                     |          |                                                                                                  |
| <p>2.2. <b>If Y/PY to 2.1:</b> Were the post-intervention variables that influenced selection likely to be associated with intervention?</p>                       | N        | <p>NA / Y / PY / <u>PN</u> / <u>N</u> / NI</p>                                                   |
| <p>2.3 <b>If Y/PY to 2.2:</b> Were the post-intervention variables that influenced selection likely to be influenced by the outcome or a cause of the outcome?</p> | N        | <p>NA / Y / PY / <u>PN</u> / <u>N</u> / NI</p>                                                   |
| <p>2.4. Do start of follow-up and start of intervention coincide for most participants?</p>                                                                        | PY       | <p><u>Y</u> / <u>PY</u> / <u>PN</u> / <u>N</u> / NI</p>                                          |
| <p>2.5. <b>If Y/PY to 2.2 and 2.3, or N/PN to 2.4:</b> Were adjustment techniques used that are likely to correct for the presence of selection biases?</p>        |          | <p>NA / <u>Y</u> / <u>PY</u> / <u>PN</u> / <u>N</u> / NI</p>                                     |
| <p><b>Risk of bias judgement</b></p>                                                                                                                               | Moderate | <p>Low / Moderate / Serious / Critical / NI</p>                                                  |
| <p>Optional: What is the predicted direction of bias due to selection of participants into the study?</p>                                                          |          | <p>Favours experimental / Favours comparator / Towards null / Away from null / Unpredictable</p> |

**Bias in classification of interventions**

|                                                                                                                        |     |                                                                                                               |
|------------------------------------------------------------------------------------------------------------------------|-----|---------------------------------------------------------------------------------------------------------------|
| 3.1 Were intervention groups clearly defined?                                                                          | Y   | <u>Y</u> / PY / PN / N<br>/ NI                                                                                |
| 3.2 Was the information used to define intervention groups recorded at the start of the intervention?                  | Y   | <u>Y</u> / PY / PN / N<br>/ NI                                                                                |
| 3.3 Could classification of intervention status have been affected by knowledge of the outcome or risk of the outcome? | N   | Y / PY / <u>PN</u> / <u>N</u><br>/ NI                                                                         |
| <b>Risk of bias judgement</b>                                                                                          | low | Low /<br>Moderate /<br>Serious /<br>Critical / NI                                                             |
| Optional: What is the predicted direction of bias due to classification of interventions?                              |     | Favours<br>experimental /<br>Favours<br>comparator /<br>Towards null<br>/Away from<br>null /<br>Unpredictable |

**Bias due to missing data**

|                                                                                                                                                 |     |                                                                                           |
|-------------------------------------------------------------------------------------------------------------------------------------------------|-----|-------------------------------------------------------------------------------------------|
| 5.1 Were outcome data available for all, or nearly all, participants?                                                                           | PY  | <u>Y / PY</u> / <u>PN / N</u> / NI                                                        |
| 5.2 Were participants excluded due to missing data on intervention status?                                                                      | PN  | Y / PY / <u>PN / N</u> / NI                                                               |
| 5.3 Were participants excluded due to missing data on other variables needed for the analysis?                                                  | NI  | Y / PY / <u>PN / N</u> / NI                                                               |
| 5.4 <b>If PN/N to 5.1, or Y/PY to 5.2 or 5.3:</b> Are the proportion of participants and reasons for missing data similar across interventions? | NI  | NA / <u>Y / PY</u> / <u>PN / N</u> / NI                                                   |
| 5.5 <b>If PN/N to 5.1, or Y/PY to 5.2 or 5.3:</b> Is there evidence that results were robust to the presence of missing data?                   | NI  | NA / <u>Y / PY</u> / <u>PN / N</u> / NI                                                   |
| <b>Risk of bias judgement</b>                                                                                                                   | Low | Low / Moderate / Serious / Critical / NI                                                  |
| Optional: What is the predicted direction of bias due to missing data?                                                                          |     | Favours experimental / Favours comparator / Towards null / Away from null / Unpredictable |

**Bias in measurement of outcomes**

|                                                                                                |     |                                                                                           |
|------------------------------------------------------------------------------------------------|-----|-------------------------------------------------------------------------------------------|
| 6.1 Could the outcome measure have been influenced by knowledge of the intervention received?  | N   | Y / PY / <u>PN / N</u> / NI                                                               |
| 6.2 Were outcome assessors aware of the intervention received by study participants?           | NI  | Y / PY / <u>PN / N</u> / NI                                                               |
| 6.3 Were the methods of outcome assessment comparable across intervention groups?              | Y   | <u>Y / PY</u> / <u>PN / N</u> / NI                                                        |
| 6.4 Were any systematic errors in measurement of the outcome related to intervention received? | PN  | Y / PY / <u>PN / N</u> / NI                                                               |
| <b>Risk of bias judgement</b>                                                                  | low | Low / Moderate / Serious / Critical / NI                                                  |
| Optional: What is the predicted direction of bias due to measurement of outcomes?              |     | Favours experimental / Favours comparator / Towards null / Away from null / Unpredictable |

**Bias in selection of the reported result**

|                                                                                                                                                                                    |                        |                                                                                                                             |
|------------------------------------------------------------------------------------------------------------------------------------------------------------------------------------|------------------------|-----------------------------------------------------------------------------------------------------------------------------|
| <p>Is the reported effect estimate likely to be selected, on the basis of the results, from...</p> <p>7.1. ... multiple outcome <i>measurements</i> within the outcome domain?</p> |                        | <p>Y / PY / <u>PN</u> / N<br/>/ NI</p>                                                                                      |
| <p>7.2 ... multiple <i>analyses</i> of the intervention-outcome relationship?</p>                                                                                                  | <p>N</p>               | <p>Y / PY / <u>PN</u> / N<br/>/ NI</p>                                                                                      |
| <p>7.3 ... different <i>subgroups</i>?</p>                                                                                                                                         | <p>N</p>               | <p>Y / PY / <u>PN</u> / N<br/>/ NI</p>                                                                                      |
| <p><b>Risk of bias judgement</b></p>                                                                                                                                               | <p>Low to moderate</p> | <p>Low /<br/>Moderate /<br/>Serious /<br/>Critical / NI</p>                                                                 |
| <p>Optional: What is the predicted direction of bias due to selection of the reported result?</p>                                                                                  |                        | <p>Favours<br/>experimental /<br/>Favours<br/>comparator /<br/>Towards null<br/>/Away from<br/>null /<br/>Unpredictable</p> |



**Overall bias**

|                                                                             |                 |                                                                                                               |
|-----------------------------------------------------------------------------|-----------------|---------------------------------------------------------------------------------------------------------------|
| <b>Risk of bias judgement</b>                                               | Low to moderate | Low /<br>Moderate /<br>Serious /<br>Critical / NI                                                             |
| Optional: What is the overall predicted direction of bias for this outcome? |                 | Favours<br>experimental /<br>Favours<br>comparator /<br>Towards null<br>/Away from<br>null /<br>Unpredictable |

## Bloos, 2014

| Signalling questions                                                                                                                                                                                                                                                                                                               | Description | Response options              |
|------------------------------------------------------------------------------------------------------------------------------------------------------------------------------------------------------------------------------------------------------------------------------------------------------------------------------------|-------------|-------------------------------|
| <b>Bias due to confounding</b>                                                                                                                                                                                                                                                                                                     |             |                               |
| <p>1.1 Is there potential for confounding of the effect of intervention in this study?</p> <p><b>If N/PN to 1.1:</b> the study can be considered to be at low risk of bias due to confounding and no further signalling questions need be considered</p>                                                                           | PN          | Y / PY / <u>PN</u> / <u>N</u> |
| <p><b>If Y/PY to 1.1:</b> determine whether there is a need to assess time-varying confounding:</p>                                                                                                                                                                                                                                |             |                               |
| <p>1.2. Was the analysis based on splitting participants' follow up time according to intervention received?</p> <p><b>If N/PN,</b> answer questions relating to baseline confounding (1.4 to 1.6)</p> <p><b>If Y/PY,</b> go to question 1.3.</p>                                                                                  |             | NA / Y / PY / PN / N / NI     |
| <p>1.3. Were intervention discontinuations or switches likely to be related to factors that are prognostic for the outcome?</p> <p><b>If N/PN,</b> answer questions relating to baseline confounding (1.4 to 1.6)</p> <p><b>If Y/PY,</b> answer questions relating to both baseline and time-varying confounding (1.7 and 1.8)</p> |             | NA / Y / PY / PN / N / NI     |

|                                                                                                                                                              |  |                                                                       |
|--------------------------------------------------------------------------------------------------------------------------------------------------------------|--|-----------------------------------------------------------------------|
| <b>Questions relating to baseline confounding only</b>                                                                                                       |  |                                                                       |
| 1.4. Did the authors use an appropriate analysis method that controlled for all the important confounding domains?                                           |  | NA / <u>Y</u> / <u>PY</u> /<br>PN / N / NI                            |
| 1.5. <b>If <u>Y/PY</u> to 1.4:</b> Were confounding domains that were controlled for measured validly and reliably by the variables available in this study? |  | NA / <u>Y</u> / <u>PY</u> /<br>PN / N / NI                            |
| 1.6. Did the authors control for any post-intervention variables that could have been affected by the intervention?                                          |  | NA / <u>Y</u> / <u>PY</u> /<br><u>PN</u> / N / NI                     |
| <b>Questions relating to baseline and time-varying confounding</b>                                                                                           |  |                                                                       |
| 1.7. Did the authors use an appropriate analysis method that controlled for all the important confounding domains and for time-varying confounding?          |  | NA / <u>Y</u> / <u>PY</u> /<br>PN / N / NI                            |
| 1.8. <b>If <u>Y/PY</u> to 1.7:</b> Were confounding domains that were controlled for measured validly and reliably by the variables available in this study? |  | NA / <u>Y</u> / <u>PY</u> /<br>PN / N / NI                            |
| <b>Risk of bias judgement</b>                                                                                                                                |  | Low /<br>Moderate /<br>Serious /<br>Critical / NI                     |
| Optional: What is the predicted direction of bias due to confounding?                                                                                        |  | Favours<br>experimental /<br>Favours<br>comparator /<br>Unpredictable |

**Bias in selection of participants into the study**

|                                                                                                                                                                                                                                                                                                                                                                                                                                                                                                                                             |            |                                                                                                                                         |
|---------------------------------------------------------------------------------------------------------------------------------------------------------------------------------------------------------------------------------------------------------------------------------------------------------------------------------------------------------------------------------------------------------------------------------------------------------------------------------------------------------------------------------------------|------------|-----------------------------------------------------------------------------------------------------------------------------------------|
| <p>2.1. Was selection of participants into the study (or into the analysis) based on participant characteristics observed after the start of intervention?</p> <p><b>If <u>N/PN</u> to 2.1:</b> go to 2.4</p> <p>2.2. <b>If <u>Y/PY</u> to 2.1:</b> Were the post-intervention variables that influenced selection likely to be associated with intervention?</p> <p>2.3 <b>If <u>Y/PY</u> to 2.2:</b> Were the post-intervention variables that influenced selection likely to be influenced by the outcome or a cause of the outcome?</p> | <p>PN</p>  | <p><u>Y / PY</u> / <u>PN / N</u> / NI</p> <p>NA / <u>Y / PY</u> / <u>PN / N</u> / NI</p> <p>NA / <u>Y / PY</u> / <u>PN / N</u> / NI</p> |
| <p>2.4. Do start of follow-up and start of intervention coincide for most participants?</p>                                                                                                                                                                                                                                                                                                                                                                                                                                                 | <p>Y</p>   | <p><u>Y / PY</u> / <u>PN / N</u> / NI</p>                                                                                               |
| <p>2.5. <b>If <u>Y/PY</u> to 2.2 and 2.3, or <u>N/PN</u> to 2.4:</b> Were adjustment techniques used that are likely to correct for the presence of selection biases?</p>                                                                                                                                                                                                                                                                                                                                                                   |            | <p>NA / <u>Y / PY</u> / <u>PN / N</u> / NI</p>                                                                                          |
| <p><b>Risk of bias judgement</b></p>                                                                                                                                                                                                                                                                                                                                                                                                                                                                                                        | <p>Low</p> | <p>Low / Moderate / Serious / Critical / NI</p>                                                                                         |
| <p>Optional: What is the predicted direction of bias due to selection of participants into the study?</p>                                                                                                                                                                                                                                                                                                                                                                                                                                   |            | <p>Favours experimental / Favours comparator / Towards null / Away from null / Unpredictable</p>                                        |

**Bias in classification of interventions**

|                                                                                                                        |     |                                                                                                               |
|------------------------------------------------------------------------------------------------------------------------|-----|---------------------------------------------------------------------------------------------------------------|
| 3.1 Were intervention groups clearly defined?                                                                          | Y   | <u>Y / PY</u> / <u>PN</u> / N<br>/ NI                                                                         |
| 3.2 Was the information used to define intervention groups recorded at the start of the intervention?                  | Y   | <u>Y / PY</u> / <u>PN</u> / N<br>/ NI                                                                         |
| 3.3 Could classification of intervention status have been affected by knowledge of the outcome or risk of the outcome? | PN  | Y / PY / <u>PN</u> / <u>N</u><br>/ NI                                                                         |
| <b>Risk of bias judgement</b>                                                                                          | low | Low /<br>Moderate /<br>Serious /<br>Critical / NI                                                             |
| Optional: What is the predicted direction of bias due to classification of interventions?                              |     | Favours<br>experimental /<br>Favours<br>comparator /<br>Towards null<br>/Away from<br>null /<br>Unpredictable |

**Bias due to missing data**

|                                                                                                                                                 |          |                                                                                           |
|-------------------------------------------------------------------------------------------------------------------------------------------------|----------|-------------------------------------------------------------------------------------------|
| 5.1 Were outcome data available for all, or nearly all, participants?                                                                           | PY       | <u>Y / PY</u> / <u>PN / N</u> / NI                                                        |
| 5.2 Were participants excluded due to missing data on intervention status?                                                                      | Y        | Y / PY / <u>PN / N</u> / NI                                                               |
| 5.3 Were participants excluded due to missing data on other variables needed for the analysis?                                                  | Y        | Y / PY / <u>PN / N</u> / NI                                                               |
| 5.4 <b>If PN/N to 5.1, or Y/PY to 5.2 or 5.3:</b> Are the proportion of participants and reasons for missing data similar across interventions? | PY       | NA / <u>Y / PY</u> / <u>PN / N</u> / NI                                                   |
| 5.5 <b>If PN/N to 5.1, or Y/PY to 5.2 or 5.3:</b> Is there evidence that results were robust to the presence of missing data?                   | PY       | NA / <u>Y / PY</u> / <u>PN / N</u> / NI                                                   |
| <b>Risk of bias judgement</b>                                                                                                                   | Moderate | Low / Moderate / Serious / Critical / NI                                                  |
| Optional: What is the predicted direction of bias due to missing data?                                                                          |          | Favours experimental / Favours comparator / Towards null / Away from null / Unpredictable |

**Bias in measurement of outcomes**

|                                                                                                |     |                                                                                           |
|------------------------------------------------------------------------------------------------|-----|-------------------------------------------------------------------------------------------|
| 6.1 Could the outcome measure have been influenced by knowledge of the intervention received?  | N   | Y / PY / <u>PN / N</u> / NI                                                               |
| 6.2 Were outcome assessors aware of the intervention received by study participants?           | NI  | Y / PY / <u>PN / N</u> / NI                                                               |
| 6.3 Were the methods of outcome assessment comparable across intervention groups?              | Y   | <u>Y / PY</u> / <u>PN / N</u> / NI                                                        |
| 6.4 Were any systematic errors in measurement of the outcome related to intervention received? | PN  | Y / PY / <u>PN / N</u> / NI                                                               |
| <b>Risk of bias judgement</b>                                                                  | Low | Low / Moderate / Serious / Critical / NI                                                  |
| Optional: What is the predicted direction of bias due to measurement of outcomes?              |     | Favours experimental / Favours comparator / Towards null / Away from null / Unpredictable |

**Bias in selection of the reported result**

|                                                                                             |     |                                                                                           |
|---------------------------------------------------------------------------------------------|-----|-------------------------------------------------------------------------------------------|
| Is the reported effect estimate likely to be selected, on the basis of the results, from... |     |                                                                                           |
| 7.1. ... multiple outcome <i>measurements</i> within the outcome domain?                    | NI  | Y / PY / <u>PN / N</u> / NI                                                               |
| 7.2 ... multiple <i>analyses</i> of the intervention-outcome relationship?                  | NI  | Y / PY / <u>PN / N</u> / NI                                                               |
| 7.3 ... different <i>subgroups</i> ?                                                        | NI  | Y / PY / <u>PN / N</u> / NI                                                               |
| <b>Risk of bias judgement</b>                                                               | low | Low / Moderate / Serious / Critical / NI                                                  |
| Optional: What is the predicted direction of bias due to selection of the reported result?  |     | Favours experimental / Favours comparator / Towards null / Away from null / Unpredictable |



**Overall bias**

|                                                                             |     |                                                                                                               |
|-----------------------------------------------------------------------------|-----|---------------------------------------------------------------------------------------------------------------|
| <b>Risk of bias judgement</b>                                               | low | Low /<br>Moderate /<br>Serious /<br>Critical / NI                                                             |
| Optional: What is the overall predicted direction of bias for this outcome? |     | Favours<br>experimental /<br>Favours<br>comparator /<br>Towards null<br>/Away from<br>null /<br>Unpredictable |

|                                                                                                                                                                                                                                              |                                                                                                                                                                                                                                |                                                                           |                                            |
|----------------------------------------------------------------------------------------------------------------------------------------------------------------------------------------------------------------------------------------------|--------------------------------------------------------------------------------------------------------------------------------------------------------------------------------------------------------------------------------|---------------------------------------------------------------------------|--------------------------------------------|
| <b>Study details</b>                                                                                                                                                                                                                         |                                                                                                                                                                                                                                |                                                                           |                                            |
| <b>Reference</b>                                                                                                                                                                                                                             | Bloos F et al, Effect of Sodium Selenite Administration and Procalcitonin-Guided Therapy on Mortality in Patients With Severe Sepsis or Septic Shock: A Randomized Clinical Trial. JAMA Intern Med. 2016 Sep 1;176(9):1266-76. |                                                                           |                                            |
| <b>Study design</b>                                                                                                                                                                                                                          |                                                                                                                                                                                                                                |                                                                           |                                            |
| <input checked="" type="checkbox"/> Individually-randomized parallel-group trial<br><input type="checkbox"/> Cluster-randomized parallel-group trial<br><input type="checkbox"/> Individually randomized cross-over (or other matched) trial |                                                                                                                                                                                                                                |                                                                           |                                            |
| <b>For the purposes of this assessment, the interventions being compared are defined as</b>                                                                                                                                                  |                                                                                                                                                                                                                                |                                                                           |                                            |
| Experimental:                                                                                                                                                                                                                                | high-dose intravenous sodium selenite treatment (GROUP 1)                                                                                                                                                                      | Comparator:                                                               | Placebo                                    |
| Experimental:                                                                                                                                                                                                                                | procalcitonin-guided anti-infectious therapy (GROUP 2)                                                                                                                                                                         | Comparator:                                                               | Standard anti-infectious therapy algorithm |
| <b>Specify which outcome is being assessed for risk of bias</b>                                                                                                                                                                              |                                                                                                                                                                                                                                | 28-day mortality, %                                                       |                                            |
| <b>Specify the numerical result being assessed.</b> In case of multiple alternative analyses being presented, specify the numeric result (e.g. RR = 1.52 (95% CI 0.83 to 2.77) and/or a reference (e.g. to a                                 |                                                                                                                                                                                                                                | 28.3% GROUP 1 vs. 25.5% placebo<br>25.6% GROUP 2 vs 28.2% no PCT guidance |                                            |

table, figure or paragraph) that uniquely defines the result being assessed.

**Is the review team's aim for this result...?**

- to assess the effect of *assignment to intervention* (the 'intention-to-treat' effect)
- to assess the effect of *adhering to intervention* (the 'per-protocol' effect)

**If the aim is to assess the effect of *adhering to intervention***, select the deviations from intended intervention that should be addressed (at least one must be checked):

- occurrence of non-protocol interventions
- failures in implementing the intervention that could have affected the outcome
- non-adherence to their assigned intervention by trial participants

**Which of the following sources were obtained to help inform the risk-of-bias assessment? (tick as many as apply)**

- Journal article(s) with results of the trial
- Trial protocol
- Statistical analysis plan (SAP)
- Non-commercial trial registry record (e.g. ClinicalTrials.gov record)
- Company-owned trial registry record (e.g. GSK Clinical Study Register record)
- "Grey literature" (e.g. unpublished thesis)
- Conference abstract(s) about the trial
- Regulatory document (e.g. Clinical Study Report, Drug Approval Package)
- Research ethics application
- Grant database summary (e.g. NIH RePORTER or Research Councils UK Gateway to Research)
- Personal communication with trialist
- Personal communication with the sponsor



Risk of bias assessment

Responses underlined in green are potential markers for low risk of bias, and responses in **red** are potential markers for a risk of bias. Where questions relate only to sign posts to other questions, no formatting is used.

### Domain 1: Risk of bias arising from the randomization process

| Signalling questions                                                                                       | Comments | Response options                                                                               |
|------------------------------------------------------------------------------------------------------------|----------|------------------------------------------------------------------------------------------------|
| 1.1 Was the allocation sequence random?                                                                    | Y        | <u>Y</u> / PY / PN / N / NI                                                                    |
| 1.2 Was the allocation sequence concealed until participants were enrolled and assigned to interventions?  | PY       | <u>Y</u> / PY / PN / N / NI                                                                    |
| 1.3 Did baseline differences between intervention groups suggest a problem with the randomization process? | PN       | Y / PY / <u>PN</u> / N / NI                                                                    |
| Risk-of-bias judgement                                                                                     | Low      | Low / High / Some concerns                                                                     |
| Optional: What is the predicted direction of bias arising from the randomization process?                  |          | NA / Favours experimental / Favours comparator / Towards null / Away from null / Unpredictable |

Domain 2: Risk of bias due to deviations from the intended interventions (*effect of assignment to intervention*)

| Signalling questions                                                                                                                                                           | Comments                       | Response options                 |
|--------------------------------------------------------------------------------------------------------------------------------------------------------------------------------|--------------------------------|----------------------------------|
| 2.1. Were participants aware of their assigned intervention during the trial?                                                                                                  | N (GROUP 1)<br>Y (GROUP 2)     | Y / PY / <u>PN / N</u> / NI      |
| 2.2. Were carers and people delivering the interventions aware of participants' assigned intervention during the trial?                                                        | N (GROUP 1)<br>Y (GROUP 2)     | Y / PY / <u>PN / N</u> / NI      |
| 2.3. If <u>Y/PY/NI</u> to 2.1 or 2.2: Were there deviations from the intended intervention that arose because of the trial context?                                            | PN (GROUP 2)                   | NA / Y / PY / <u>PN / N</u> / NI |
| 2.4. If <u>Y/PY</u> to 2.3: Were these deviations likely to have affected the outcome?                                                                                         |                                | NA / Y / PY / <u>PN / N</u> / NI |
| 2.5. If <u>Y/PY/NI</u> to 2.4: Were these deviations from intended intervention balanced between groups?                                                                       |                                | NA / <u>Y / PY</u> / PN / N / NI |
| 2.6. Was an appropriate analysis used to estimate the effect of assignment to intervention?                                                                                    | Y                              | <u>Y / PY</u> / PN / N / NI      |
| 2.7. If <u>N/PN/NI</u> to 2.6: Was there potential for a substantial impact (on the result) of the failure to analyse participants in the group to which they were randomized? |                                | NA / Y / PY / <u>PN / N</u> / NI |
| Risk-of-bias judgement                                                                                                                                                         | Low (both intervention groups) | Low / High / Some concerns       |

|                                                                                                  |  |                                                                                                |
|--------------------------------------------------------------------------------------------------|--|------------------------------------------------------------------------------------------------|
| Optional: What is the predicted direction of bias due to deviations from intended interventions? |  | NA / Favours experimental / Favours comparator / Towards null / Away from null / Unpredictable |
|--------------------------------------------------------------------------------------------------|--|------------------------------------------------------------------------------------------------|

Domain 3: Missing outcome data

| Signalling questions                                                                                    | Comments | Response options                                                                               |
|---------------------------------------------------------------------------------------------------------|----------|------------------------------------------------------------------------------------------------|
| 3.1 Were data for this outcome available for all, or nearly all, participants randomized?               | Y        | <u>Y</u> / PY / PN / N / NI                                                                    |
| 3.2 If <u>N/PN/NI</u> to 3.1: Is there evidence that the result was not biased by missing outcome data? |          | NA / <u>Y</u> / PY / PN / N                                                                    |
| 3.3 If <u>N/PN</u> to 3.2: Could missingness in the outcome depend on its true value?                   |          | NA / Y / PY / <u>PN</u> / N / NI                                                               |
| 3.4 If <u>Y/PY/NI</u> to 3.3: Is it likely that missingness in the outcome depended on its true value?  |          | NA / Y / PY / <u>PN</u> / N / NI                                                               |
| Risk-of-bias judgement                                                                                  | Low      | Low / High / Some concerns                                                                     |
| Optional: What is the predicted direction of bias due to missing outcome data?                          |          | NA / Favours experimental / Favours comparator / Towards null / Away from null / Unpredictable |



Domain 4: Risk of bias in measurement of the outcome

| Signalling questions                                                                                                                   | Comments                                                                                                                                                                                                                                                                                                                                                                                                                                                                                                                     | Response options                 |
|----------------------------------------------------------------------------------------------------------------------------------------|------------------------------------------------------------------------------------------------------------------------------------------------------------------------------------------------------------------------------------------------------------------------------------------------------------------------------------------------------------------------------------------------------------------------------------------------------------------------------------------------------------------------------|----------------------------------|
| <b>4.1 Was the method of measuring the outcome inappropriate?</b>                                                                      | PN<br>We found a statistically significant interaction between the 2 study interventions regarding the primary end point (P = .03). Because there was no indication that selenium influenced the plasma procalcitonin levels or that procalcitonin guidance influenced the plasma selenium levels we decided to accept the observed statistical interaction as a chance finding and proceed with the factorial analysis as originally planned. However, we also report data in consideration of the significant interaction. | Y / PY / <u>PN</u> / N / NI      |
| <b>4.2 Could measurement or ascertainment of the outcome have differed between intervention groups?</b>                                | PN                                                                                                                                                                                                                                                                                                                                                                                                                                                                                                                           | Y / PY / <u>PN</u> / N / NI      |
| <b>4.3 If <u>N/PN/NI</u> to 4.1 and 4.2: Were outcome assessors aware of the intervention received by study participants?</b>          | PN (Group 1)<br>PY (Group 2)                                                                                                                                                                                                                                                                                                                                                                                                                                                                                                 | NA / Y / PY / <u>PN</u> / N / NI |
| <b>4.4 If <u>Y/PY/NI</u> to 4.3: Could assessment of the outcome have been influenced by knowledge of intervention received?</b>       | PN                                                                                                                                                                                                                                                                                                                                                                                                                                                                                                                           | NA / Y / PY / <u>PN</u> / N / NI |
| <b>4.5 If <u>Y/PY/NI</u> to 4.4: Is it likely that assessment of the outcome was influenced by knowledge of intervention received?</b> |                                                                                                                                                                                                                                                                                                                                                                                                                                                                                                                              | NA / Y / PY / <u>PN</u> / N / NI |
| <b>Risk-of-bias judgement</b>                                                                                                          | Low                                                                                                                                                                                                                                                                                                                                                                                                                                                                                                                          | Low / High / Some concerns       |

|                                                                                  |  |                                                                                                |
|----------------------------------------------------------------------------------|--|------------------------------------------------------------------------------------------------|
| Optional: What is the predicted direction of bias in measurement of the outcome? |  | NA / Favours experimental / Favours comparator / Towards null / Away from null / Unpredictable |
|----------------------------------------------------------------------------------|--|------------------------------------------------------------------------------------------------|

Domain 5: Risk of bias in selection of the reported result

| Signalling questions                                                                                                                                                                | Comments | Response options                                                                               |
|-------------------------------------------------------------------------------------------------------------------------------------------------------------------------------------|----------|------------------------------------------------------------------------------------------------|
| 5.1 Were the data that produced this result analysed in accordance with a pre-specified analysis plan that was finalized before unblinded outcome data were available for analysis? | Y        | <u>Y</u> / PY / PN / N / NI                                                                    |
| Is the numerical result being assessed likely to have been selected, on the basis of the results, from...                                                                           |          |                                                                                                |
| 5.2. ... multiple eligible outcome measurements (e.g. scales, definitions, time points) within the outcome domain?                                                                  | N        | Y / PY / <u>PN</u> / N / NI                                                                    |
| 5.3 ... multiple eligible analyses of the data?                                                                                                                                     | PN       | Y / PY / <u>PN</u> / N / NI                                                                    |
| <b>Risk-of-bias judgement</b>                                                                                                                                                       | Low      | Low / High / Some concerns                                                                     |
| Optional: What is the predicted direction of bias due to selection of the reported result?                                                                                          |          | NA / Favours experimental / Favours comparator / Towards null / Away from null / Unpredictable |

Overall risk of bias

|                                                                             |                                                                                                                                                                                                                                                                                                                                                                                                                                                                        |                                                                                                |
|-----------------------------------------------------------------------------|------------------------------------------------------------------------------------------------------------------------------------------------------------------------------------------------------------------------------------------------------------------------------------------------------------------------------------------------------------------------------------------------------------------------------------------------------------------------|------------------------------------------------------------------------------------------------|
| <b>Risk-of-bias judgement</b>                                               | Low                                                                                                                                                                                                                                                                                                                                                                                                                                                                    | Low / High / Some concerns                                                                     |
| Optional: What is the overall predicted direction of bias for this outcome? |                                                                                                                                                                                                                                                                                                                                                                                                                                                                        | NA / Favours experimental / Favours comparator / Towards null / Away from null / Unpredictable |
| Comments                                                                    | <p>Authors found a statistically significant interaction between the 2 study interventions regarding the primary end point (P = .03). Because there was no indication that selenium influenced the plasma procalcitonin levels or that procalcitonin guidance influenced the plasma selenium levels authors decided to accept the observed statistical interaction as a chance finding and proceed with the factorial analysis as originally planned. See ETable4.</p> |                                                                                                |

|                                                                                                                                                                                                              |                                                                                                                                                                                               |
|--------------------------------------------------------------------------------------------------------------------------------------------------------------------------------------------------------------|-----------------------------------------------------------------------------------------------------------------------------------------------------------------------------------------------|
| <b>Study details</b>                                                                                                                                                                                         |                                                                                                                                                                                               |
| <b>Reference</b>                                                                                                                                                                                             | Bloos F et al, Effect of a Multifaceted Educational Intervention for Anti-Infectious Measures on Sepsis Mortality: A Cluster Randomized Trial. Intensive Care Med. 2017 Nov;43(11):1602-1612. |
| <b>Study design</b>                                                                                                                                                                                          |                                                                                                                                                                                               |
| <input type="checkbox"/> Individually-randomized parallel-group trial                                                                                                                                        |                                                                                                                                                                                               |
| <input checked="" type="checkbox"/> Cluster-randomized parallel-group trial                                                                                                                                  |                                                                                                                                                                                               |
| <input type="checkbox"/> Individually randomized cross-over (or other matched) trial                                                                                                                         |                                                                                                                                                                                               |
| <b>For the purposes of this assessment, the interventions being compared are defined as</b>                                                                                                                  |                                                                                                                                                                                               |
| Experimental: multifaceted interventions including local quality improvement teams, educational outreach, audit, feedback, and reminders                                                                     | Comparator: conventional continuous medical education (CME) measures                                                                                                                          |
| <b>Specify which outcome is being assessed for risk of bias</b>                                                                                                                                              | 28-day mortality, %                                                                                                                                                                           |
| <b>Specify the numerical result being assessed.</b> In case of multiple alternative analyses being presented, specify the numeric result (e.g. RR = 1.52 (95% CI 0.83 to 2.77) and/or a reference (e.g. to a | 35.1% (883 of 2596 patients) vs. 26.7% (403 of 1587 patients; p = 0.01)                                                                                                                       |

table, figure or paragraph) that uniquely defines the result being assessed.

|  |
|--|
|  |
|--|

**Is the review team's aim for this result...?**

- to assess the effect of *assignment to intervention* (the 'intention-to-treat' effect)
- to assess the effect of *adhering to intervention* (the 'per-protocol' effect)

**If the aim is to assess the effect of *adhering to intervention***, select the deviations from intended intervention that should be addressed (at least one must be checked):

- occurrence of non-protocol interventions
- failures in implementing the intervention that could have affected the outcome
- non-adherence to their assigned intervention by trial participants

**Which of the following sources were obtained to help inform the risk-of-bias assessment? (tick as many as apply)**

- Journal article(s) with results of the trial
- Trial protocol
- Statistical analysis plan (SAP)
- Non-commercial trial registry record (e.g. ClinicalTrials.gov record)
- Company-owned trial registry record (e.g. GSK Clinical Study Register record)
- "Grey literature" (e.g. unpublished thesis)
- Conference abstract(s) about the trial
- Regulatory document (e.g. Clinical Study Report, Drug Approval Package)
- Research ethics application
- Grant database summary (e.g. NIH RePORTER or Research Councils UK Gateway to Research)
- Personal communication with trialist
- Personal communication with the sponsor



Risk of bias assessment

Responses underlined in green are potential markers for low risk of bias, and responses in **red** are potential markers for a risk of bias. Where questions relate only to sign posts to other questions, no formatting is used.

### Domain 1: Risk of bias arising from the randomization process

| Signalling questions                                                                                       | Comments | Response options                                                                               |
|------------------------------------------------------------------------------------------------------------|----------|------------------------------------------------------------------------------------------------|
| 1.1 Was the allocation sequence random?                                                                    | Y        | <u>Y</u> / PY / PN / N / NI                                                                    |
| 1.2 Was the allocation sequence concealed until participants were enrolled and assigned to interventions?  | PY       | <u>Y</u> / PY / PN / N / NI                                                                    |
| 1.3 Did baseline differences between intervention groups suggest a problem with the randomization process? | PN       | Y / PY / <u>PN</u> / N / NI                                                                    |
| Risk-of-bias judgement                                                                                     | Low      | Low / High / Some concerns                                                                     |
| Optional: What is the predicted direction of bias arising from the randomization process?                  |          | NA / Favours experimental / Favours comparator / Towards null / Away from null / Unpredictable |



Domain 2: Risk of bias due to deviations from the intended interventions (*effect of assignment to intervention*)

| Signalling questions                                                                                                                                                           | Comments | Response options                 |
|--------------------------------------------------------------------------------------------------------------------------------------------------------------------------------|----------|----------------------------------|
| 2.1. Were participants aware of their assigned intervention during the trial?                                                                                                  | Y        | Y / PY / <u>PN / N</u> / NI      |
| 2.2. Were carers and people delivering the interventions aware of participants' assigned intervention during the trial?                                                        | Y        | Y / PY / <u>PN / N</u> / NI      |
| 2.3. If <u>Y/PY/NI</u> to 2.1 or 2.2: Were there deviations from the intended intervention that arose because of the trial context?                                            | PN       | NA / Y / PY / <u>PN / N</u> / NI |
| 2.4. If <u>Y/PY</u> to 2.3: Were these deviations likely to have affected the outcome?                                                                                         |          | NA / Y / PY / <u>PN / N</u> / NI |
| 2.5. If <u>Y/PY/NI</u> to 2.4: Were these deviations from intended intervention balanced between groups?                                                                       |          | NA / <u>Y / PY</u> / PN / N / NI |
| 2.6. Was an appropriate analysis used to estimate the effect of assignment to intervention?                                                                                    | Y        | <u>Y / PY</u> / PN / N / NI      |
| 2.7. If <u>N/PN/NI</u> to 2.6: Was there potential for a substantial impact (on the result) of the failure to analyse participants in the group to which they were randomized? |          | NA / Y / PY / <u>PN / N</u> / NI |
| Risk-of-bias judgement                                                                                                                                                         | low      | Low / High / Some concerns       |

|                                                                                                  |  |                                                                                                |
|--------------------------------------------------------------------------------------------------|--|------------------------------------------------------------------------------------------------|
| Optional: What is the predicted direction of bias due to deviations from intended interventions? |  | NA / Favours experimental / Favours comparator / Towards null / Away from null / Unpredictable |
|--------------------------------------------------------------------------------------------------|--|------------------------------------------------------------------------------------------------|

Domain 3: Missing outcome data

| Signalling questions                                                                                    | Comments | Response options                                                                               |
|---------------------------------------------------------------------------------------------------------|----------|------------------------------------------------------------------------------------------------|
| 3.1 Were data for this outcome available for all, or nearly all, participants randomized?               | N        | <u>Y/PY</u> / PN / N / NI                                                                      |
| 3.2 If <u>N/PN/NI</u> to 3.1: Is there evidence that the result was not biased by missing outcome data? | PN       | NA / <u>Y/PY</u> / PN / N                                                                      |
| 3.3 If <u>N/PN</u> to 3.2: Could missingness in the outcome depend on its true value?                   | PN       | NA / Y / PY / <u>PN/N</u> / NI                                                                 |
| 3.4 If <u>Y/PY/NI</u> to 3.3: Is it likely that missingness in the outcome depended on its true value?  |          | NA / Y / PY / <u>PN/N</u> / NI                                                                 |
| Risk-of-bias judgement                                                                                  | Low      | Low / High / Some concerns                                                                     |
| Optional: What is the predicted direction of bias due to missing outcome data?                          |          | NA / Favours experimental / Favours comparator / Towards null / Away from null / Unpredictable |

Domain 4: Risk of bias in measurement of the outcome

| Signalling questions                                                                                                            | Comments | Response options                                                                               |
|---------------------------------------------------------------------------------------------------------------------------------|----------|------------------------------------------------------------------------------------------------|
| 4.1 Was the method of measuring the outcome inappropriate?                                                                      | N        | Y / PY / <u>PN / N</u> / NI                                                                    |
| 4.2 Could measurement or ascertainment of the outcome have differed between intervention groups?                                | N        | Y / PY / <u>PN / N</u> / NI                                                                    |
| 4.3 If <u>N/PN/NI</u> to 4.1 and 4.2: Were outcome assessors aware of the intervention received by study participants?          | Y        | NA / Y / PY / <u>PN / N</u> / NI                                                               |
| 4.4 If <u>Y/PY/NI</u> to 4.3: Could assessment of the outcome have been influenced by knowledge of intervention received?       | PN       | NA / Y / PY / <u>PN / N</u> / NI                                                               |
| 4.5 If <u>Y/PY/NI</u> to 4.4: Is it likely that assessment of the outcome was influenced by knowledge of intervention received? |          | NA / Y / PY / <u>PN / N</u> / NI                                                               |
| <b>Risk-of-bias judgement</b>                                                                                                   | Low      | Low / High / Some concerns                                                                     |
| Optional: What is the predicted direction of bias in measurement of the outcome?                                                |          | NA / Favours experimental / Favours comparator / Towards null / Away from null / Unpredictable |

Domain 5: Risk of bias in selection of the reported result

| Signalling questions                                                                                                                                                                | Comments | Response options                                                                               |
|-------------------------------------------------------------------------------------------------------------------------------------------------------------------------------------|----------|------------------------------------------------------------------------------------------------|
| 5.1 Were the data that produced this result analysed in accordance with a pre-specified analysis plan that was finalized before unblinded outcome data were available for analysis? | Y        | Y / PY / PN / N / NI                                                                           |
| Is the numerical result being assessed likely to have been selected, on the basis of the results, from...                                                                           |          |                                                                                                |
| 5.2. ... multiple eligible outcome measurements (e.g. scales, definitions, time points) within the outcome domain?                                                                  | N        | Y / PY / PN / N / NI                                                                           |
| 5.3 ... multiple eligible analyses of the data?                                                                                                                                     | N        | Y / PY / PN / N / NI                                                                           |
| <b>Risk-of-bias judgement</b>                                                                                                                                                       | Low      | Low / High / Some concerns                                                                     |
| Optional: What is the predicted direction of bias due to selection of the reported result?                                                                                          |          | NA / Favours experimental / Favours comparator / Towards null / Away from null / Unpredictable |

Overall risk of bias

|                                                                             |     |                                                                                                |
|-----------------------------------------------------------------------------|-----|------------------------------------------------------------------------------------------------|
| <b>Risk-of-bias judgement</b>                                               | Low | Low / High / Some concerns                                                                     |
| Optional: What is the overall predicted direction of bias for this outcome? |     | NA / Favours experimental / Favours comparator / Towards null / Away from null / Unpredictable |
| Comments                                                                    |     |                                                                                                |

## Brunkhorst, 2012

### Study details

#### Reference

Brunkhorst FM et al. Effect of Empirical Treatment With Moxifloxacin and Meropenem vs Meropenem on Sepsis-Related Organ Dysfunction in Patients With Severe Sepsis. A Randomized Trial. JAMA, June 13, 2012—Vol 307, No. 22

### Study design

- Individually-randomized parallel-group trial
- Cluster-randomized parallel-group trial
- Individually randomized cross-over (or other matched) trial

### For the purposes of this assessment, the interventions being compared are defined as

Experimental: 

|                           |   |
|---------------------------|---|
| Moxifloxacin<br>Meropenem | + |
|---------------------------|---|

 Comparator: 

|           |
|-----------|
| Meropenem |
|-----------|

### Specify which outcome is being assessed for risk of bias

28- and 90-day mortality

Specify the numerical result being assessed. In case of multiple alternative analyses being presented, specify the numeric result (e.g. RR = 1.52 (95% CI 0.83 to 2.77) and/or a reference (e.g. to a table, figure or paragraph) that uniquely defines the result being assessed.

28-day mortality: 23.9% vs. 21.9%

90-day mortality: 35.3% vs 32.1%

### Is the review team's aim for this result...?

- to assess the effect of *assignment to intervention* (the 'intention-to-treat' effect)
- to assess the effect of *adhering to intervention* (the 'per-protocol' effect)

**If the aim is to assess the effect of adhering to intervention**, select the deviations from intended intervention that should be addressed (at least one must be checked):

- occurrence of non-protocol interventions
- failures in implementing the intervention that could have affected the outcome
- non-adherence to their assigned intervention by trial participants

**Which of the following sources were obtained to help inform the risk-of-bias assessment? (tick as many as apply)**

- Journal article(s) with results of the trial
- Trial protocol
- Statistical analysis plan (SAP)
- X Non-commercial trial registry record (e.g. ClinicalTrials.gov record)
- Company-owned trial registry record (e.g. GSK Clinical Study Register record)
- "Grey literature" (e.g. unpublished thesis)
- Conference abstract(s) about the trial
- Regulatory document (e.g. Clinical Study Report, Drug Approval Package)
- Research ethics application
- Grant database summary (e.g. NIH RePORTER or Research Councils UK Gateway to Research)
- Personal communication with trialist
- Personal communication with the sponsor



Risk of bias assessment

Responses underlined in green are potential markers for low risk of bias, and responses in **red** are potential markers for a risk of bias. Where questions relate only to sign posts to other questions, no formatting is used.

### Domain 1: Risk of bias arising from the randomization process

| Signalling questions                                                                                       | Comments | Response options                                                                               |
|------------------------------------------------------------------------------------------------------------|----------|------------------------------------------------------------------------------------------------|
| 1.1 Was the allocation sequence random?                                                                    | Y        | <u>Y</u> / PY / PN / N / NI                                                                    |
| 1.2 Was the allocation sequence concealed until participants were enrolled and assigned to interventions?  | PY       | <u>Y</u> / PY / PN / N / NI                                                                    |
| 1.3 Did baseline differences between intervention groups suggest a problem with the randomization process? | N        | Y / PY / <u>PN</u> / N / NI                                                                    |
| Risk-of-bias judgement                                                                                     | Low      | Low / High / Some concerns                                                                     |
| Optional: What is the predicted direction of bias arising from the randomization process?                  |          | NA / Favours experimental / Favours comparator / Towards null / Away from null / Unpredictable |

Domain 2: Risk of bias due to deviations from the intended interventions (*effect of assignment to intervention*)

| Signalling questions                                                                                                                                                           | Comments | Response options                 |
|--------------------------------------------------------------------------------------------------------------------------------------------------------------------------------|----------|----------------------------------|
| 2.1. Were participants aware of their assigned intervention during the trial?                                                                                                  | Y /      | Y / PY / <u>PN / N</u> / NI      |
| 2.2. Were carers and people delivering the interventions aware of participants' assigned intervention during the trial?                                                        | Y        | Y / PY / <u>PN / N</u> / NI      |
| 2.3. If <u>Y/PY/NI</u> to 2.1 or 2.2: Were there deviations from the intended intervention that arose because of the trial context?                                            | N        | NA / Y / PY / <u>PN / N</u> / NI |
| 2.4. If <u>Y/PY</u> to 2.3: Were these deviations likely to have affected the outcome?                                                                                         |          | NA / Y / PY / <u>PN / N</u> / NI |
| 2.5. If <u>Y/PY/NI</u> to 2.4: Were these deviations from intended intervention balanced between groups?                                                                       |          | NA / <u>Y / PY</u> / PN / N / NI |
| 2.6. Was an appropriate analysis used to estimate the effect of assignment to intervention?                                                                                    | Y        | <u>Y / PY</u> / PN / N / NI      |
| 2.7. If <u>N/PN/NI</u> to 2.6: Was there potential for a substantial impact (on the result) of the failure to analyse participants in the group to which they were randomized? |          | NA / Y / PY / <u>PN / N</u> / NI |
| Risk-of-bias judgement                                                                                                                                                         | Low      | Low / High / Some concerns       |

|                                                                                                  |  |                                                                                                |
|--------------------------------------------------------------------------------------------------|--|------------------------------------------------------------------------------------------------|
| Optional: What is the predicted direction of bias due to deviations from intended interventions? |  | NA / Favours experimental / Favours comparator / Towards null / Away from null / Unpredictable |
|--------------------------------------------------------------------------------------------------|--|------------------------------------------------------------------------------------------------|

Domain 3: Missing outcome data

| Signalling questions                                                                                    | Comments | Response options                                                                               |
|---------------------------------------------------------------------------------------------------------|----------|------------------------------------------------------------------------------------------------|
| 3.1 Were data for this outcome available for all, or nearly all, participants randomized?               | Y        | <u>Y</u> / PY / PN / N / NI                                                                    |
| 3.2 If <u>N/PN/NI</u> to 3.1: Is there evidence that the result was not biased by missing outcome data? |          | NA / <u>Y</u> / PY / PN / N                                                                    |
| 3.3 If <u>N/PN</u> to 3.2: Could missingness in the outcome depend on its true value?                   |          | NA / Y / PY / <u>PN</u> / N / NI                                                               |
| 3.4 If <u>Y/PY/NI</u> to 3.3: Is it likely that missingness in the outcome depended on its true value?  |          | NA / Y / PY / <u>PN</u> / N / NI                                                               |
| Risk-of-bias judgement                                                                                  | Low risk | Low / High / Some concerns                                                                     |
| Optional: What is the predicted direction of bias due to missing outcome data?                          |          | NA / Favours experimental / Favours comparator / Towards null / Away from null / Unpredictable |

Domain 4: Risk of bias in measurement of the outcome

| Signalling questions                                                                                                            | Comments | Response options                                                                               |
|---------------------------------------------------------------------------------------------------------------------------------|----------|------------------------------------------------------------------------------------------------|
| 4.1 Was the method of measuring the outcome inappropriate?                                                                      | N        | Y / PY / <u>PN / N</u> / NI                                                                    |
| 4.2 Could measurement or ascertainment of the outcome have differed between intervention groups?                                | N        | Y / PY / <u>PN / N</u> / NI                                                                    |
| 4.3 If <u>N/PN/NI</u> to 4.1 and 4.2: Were outcome assessors aware of the intervention received by study participants?          | Y        | NA / Y / PY / <u>PN / N</u> / NI                                                               |
| 4.4 If <u>Y/PY/NI</u> to 4.3: Could assessment of the outcome have been influenced by knowledge of intervention received?       | N        | NA / Y / PY / <u>PN / N</u> / NI                                                               |
| 4.5 If <u>Y/PY/NI</u> to 4.4: Is it likely that assessment of the outcome was influenced by knowledge of intervention received? |          | NA / Y / PY / <u>PN / N</u> / NI                                                               |
| <b>Risk-of-bias judgement</b>                                                                                                   | Low      | Low / High / Some concerns                                                                     |
| Optional: What is the predicted direction of bias in measurement of the outcome?                                                |          | NA / Favours experimental / Favours comparator / Towards null / Away from null / Unpredictable |

Domain 5: Risk of bias in selection of the reported result

| Signalling questions                                                                                                                                                                | Comments | Response options                                                                               |
|-------------------------------------------------------------------------------------------------------------------------------------------------------------------------------------|----------|------------------------------------------------------------------------------------------------|
| 5.1 Were the data that produced this result analysed in accordance with a pre-specified analysis plan that was finalized before unblinded outcome data were available for analysis? | Y        | Y / PY / PN / N / NI                                                                           |
| Is the numerical result being assessed likely to have been selected, on the basis of the results, from...                                                                           |          |                                                                                                |
| 5.2. ... multiple eligible outcome measurements (e.g. scales, definitions, time points) within the outcome domain?                                                                  | N        | Y / PY / PN / N / NI                                                                           |
| 5.3 ... multiple eligible analyses of the data?                                                                                                                                     | N        | Y / PY / PN / N / NI                                                                           |
| <b>Risk-of-bias judgement</b>                                                                                                                                                       | Low      | Low / High / Some concerns                                                                     |
| Optional: What is the predicted direction of bias due to selection of the reported result?                                                                                          |          | NA / Favours experimental / Favours comparator / Towards null / Away from null / Unpredictable |

Overall risk of bias

|                                                                             |     |                                                                                                |
|-----------------------------------------------------------------------------|-----|------------------------------------------------------------------------------------------------|
| <b>Risk-of-bias judgement</b>                                               | Low | Low / High / Some concerns                                                                     |
| Optional: What is the overall predicted direction of bias for this outcome? |     | NA / Favours experimental / Favours comparator / Towards null / Away from null / Unpredictable |

## Elke, 2013

Responses underlined in green are potential markers for low risk of bias, and responses in **red** are potential markers for a risk of bias. Where questions relate only to sign posts to other questions, no formatting is used.

| Signalling questions                                                                                                                                                                                                                                                                                                                                         | Description | Response options              |
|--------------------------------------------------------------------------------------------------------------------------------------------------------------------------------------------------------------------------------------------------------------------------------------------------------------------------------------------------------------|-------------|-------------------------------|
| <b>Bias due to confounding</b>                                                                                                                                                                                                                                                                                                                               |             |                               |
| <p>1.1 Is there potential for confounding of the effect of intervention in this study?</p> <p><b>If <u>N/PN</u> to 1.1:</b> the study can be considered to be at low risk of bias due to confounding and no further signalling questions need be considered</p>                                                                                              | Y           | <b>Y / PY / <u>PN / N</u></b> |
| <p><b>If <b>Y/PY</b> to 1.1:</b> determine whether there is a need to assess time-varying confounding:</p> <p>1.2. Was the analysis based on splitting participants' follow up time according to intervention received?</p> <p><b>If N/PN</b>, answer questions relating to baseline confounding (1.4 to 1.6)</p> <p><b>If Y/PY</b>, go to question 1.3.</p> | N           | NA / Y / PY / PN / N / NI     |
| <p>1.3. Were intervention discontinuations or switches likely to be related to factors that are prognostic for the outcome?</p> <p><b>If N/PN</b>, answer questions relating to baseline confounding (1.4 to 1.6)</p> <p><b>If Y/PY</b>, answer questions relating to both baseline and time-varying confounding (1.7 and 1.8)</p>                           |             | NA / Y / PY / PN / N / NI     |



|                                                                                                                                                              |          |                                                                       |
|--------------------------------------------------------------------------------------------------------------------------------------------------------------|----------|-----------------------------------------------------------------------|
| <b>Questions relating to baseline confounding only</b>                                                                                                       |          |                                                                       |
| 1.4. Did the authors use an appropriate analysis method that controlled for all the important confounding domains?                                           | PY       | NA / <u>Y</u> / <u>PY</u> / <u>PN</u><br>/ N / NI                     |
| 1.5. <b>If <u>Y/PY</u> to 1.4:</b> Were confounding domains that were controlled for measured validly and reliably by the variables available in this study? | Y        | NA / <u>Y</u> / <u>PY</u> / <u>PN</u><br>/ N / NI                     |
| 1.6. Did the authors control for any post-intervention variables that could have been affected by the intervention?                                          | PN       | NA / <u>Y</u> / <u>PY</u> / <u>PN</u><br><u>N</u> / NI                |
| <b>Questions relating to baseline and time-varying confounding</b>                                                                                           |          |                                                                       |
| 1.7. Did the authors use an appropriate analysis method that controlled for all the important confounding domains and for time-varying confounding?          | NI       | NA / <u>Y</u> / <u>PY</u> / <u>PN</u><br>/ N / NI                     |
| 1.8. <b>If <u>Y/PY</u> to 1.7:</b> Were confounding domains that were controlled for measured validly and reliably by the variables available in this study? |          | NA / <u>Y</u> / <u>PY</u> / <u>PN</u><br>/ N / NI                     |
| <b>Risk of bias judgement</b>                                                                                                                                | Moderate | Low / Moderate<br>/ Serious /<br>Critical / NI                        |
| Optional: What is the predicted direction of bias due to confounding?                                                                                        |          | Favours<br>experimental /<br>Favours<br>comparator /<br>Unpredictable |

**Bias in selection of participants into the study**

|                                                                                                                                                                                                                                                                                                                                                                |                        |                                                                                                  |
|----------------------------------------------------------------------------------------------------------------------------------------------------------------------------------------------------------------------------------------------------------------------------------------------------------------------------------------------------------------|------------------------|--------------------------------------------------------------------------------------------------|
| <p>2.1. Was selection of participants into the study (or into the analysis) based on participant characteristics observed after the start of intervention?</p>                                                                                                                                                                                                 | <p>Py</p>              | <p>Y / PY / <u>PN</u> / <u>N</u> / NI</p>                                                        |
| <p><b>If <u>N/PN</u> to 2.1:</b> go to 2.4</p> <p>2.2. <b>If Y/PY to 2.1:</b> Were the post-intervention variables that influenced selection likely to be associated with intervention?</p> <p>2.3 <b>If Y/PY to 2.2:</b> Were the post-intervention variables that influenced selection likely to be influenced by the outcome or a cause of the outcome?</p> | <p>Pn</p>              | <p>NA / Y / PY / <u>PN</u> / <u>N</u> / NI</p> <p>NA / Y / PY / <u>PN</u> / <u>N</u> / NI</p>    |
| <p>2.4. Do start of follow-up and start of intervention coincide for most participants?</p>                                                                                                                                                                                                                                                                    | <p>Y</p>               | <p><u>Y</u> / PY / PN / N / NI</p>                                                               |
| <p>2.5. <b>If Y/PY to 2.2 and 2.3, or N/PN to 2.4:</b> Were adjustment techniques used that are likely to correct for the presence of selection biases?</p>                                                                                                                                                                                                    |                        | <p>NA / <u>Y</u> / PY / PN / N / NI</p>                                                          |
| <p><b>Risk of bias judgement</b></p>                                                                                                                                                                                                                                                                                                                           | <p>Low to Moderate</p> | <p>Low / Moderate / Serious / Critical / NI</p>                                                  |
| <p>Optional: What is the predicted direction of bias due to selection of participants into the study?</p>                                                                                                                                                                                                                                                      |                        | <p>Favours experimental / Favours comparator / Towards null / Away from null / Unpredictable</p> |

**Bias in classification of interventions**

|                                                                                                                        |     |                                                                                           |
|------------------------------------------------------------------------------------------------------------------------|-----|-------------------------------------------------------------------------------------------|
| 3.1 Were intervention groups clearly defined?                                                                          | Y   | Y / PY / PN / N / NI                                                                      |
| 3.2 Was the information used to define intervention groups recorded at the start of the intervention?                  | Y   | Y / PY / PN / N / NI                                                                      |
| 3.3 Could classification of intervention status have been affected by knowledge of the outcome or risk of the outcome? | N   | Y / PY / PN / N / NI                                                                      |
| <b>Risk of bias judgement</b>                                                                                          | Low | Low / Moderate / Serious / Critical / NI                                                  |
| Optional: What is the predicted direction of bias due to classification of interventions?                              |     | Favours experimental / Favours comparator / Towards null / Away from null / Unpredictable |

**Bias due to missing data**

|                                                                                                                                                 |     |                                                                                           |
|-------------------------------------------------------------------------------------------------------------------------------------------------|-----|-------------------------------------------------------------------------------------------|
| 5.1 Were outcome data available for all, or nearly all, participants?                                                                           | Y   | <u>Y</u> / PY / PN / N / NI                                                               |
| 5.2 Were participants excluded due to missing data on intervention status?                                                                      | PN  | Y / PY / <u>PN</u> / N / NI                                                               |
| 5.3 Were participants excluded due to missing data on other variables needed for the analysis?                                                  | PN  | Y / PY / <u>PN</u> / N / NI                                                               |
| 5.4 <b>If PN/N to 5.1, or Y/PY to 5.2 or 5.3:</b> Are the proportion of participants and reasons for missing data similar across interventions? |     | NA / <u>Y</u> / PY / PN / N / NI                                                          |
| 5.5 <b>If PN/N to 5.1, or Y/PY to 5.2 or 5.3:</b> Is there evidence that results were robust to the presence of missing data?                   |     | NA / <u>Y</u> / PY / PN / N / NI                                                          |
| <b>Risk of bias judgement</b>                                                                                                                   | Low | Low / Moderate / Serious / Critical / NI                                                  |
| Optional: What is the predicted direction of bias due to missing data?                                                                          |     | Favours experimental / Favours comparator / Towards null / Away from null / Unpredictable |

**Bias in measurement of outcomes**

|                                                                                                |     |                                                                                           |
|------------------------------------------------------------------------------------------------|-----|-------------------------------------------------------------------------------------------|
| 6.1 Could the outcome measure have been influenced by knowledge of the intervention received?  | N   | Y / PY / <u>PN / N</u> / NI                                                               |
| 6.2 Were outcome assessors aware of the intervention received by study participants?           | PY  | Y / PY / <u>PN / N</u> / NI                                                               |
| 6.3 Were the methods of outcome assessment comparable across intervention groups?              | Y   | <u>Y / PY</u> / <u>PN / N</u> / NI                                                        |
| 6.4 Were any systematic errors in measurement of the outcome related to intervention received? | N   | Y / PY / <u>PN / N</u> / NI                                                               |
| <b>Risk of bias judgement</b>                                                                  | Low | Low / Moderate / Serious / Critical / NI                                                  |
| Optional: What is the predicted direction of bias due to measurement of outcomes?              |     | Favours experimental / Favours comparator / Towards null / Away from null / Unpredictable |

**Bias in selection of the reported result**

|                                                                                             |          |                                                                                           |
|---------------------------------------------------------------------------------------------|----------|-------------------------------------------------------------------------------------------|
| Is the reported effect estimate likely to be selected, on the basis of the results, from... |          |                                                                                           |
| 7.1. ... multiple outcome <i>measurements</i> within the outcome domain?                    | N        | Y / PY / <u>PN</u> / N / NI                                                               |
| 7.2 ... multiple <i>analyses</i> of the intervention-outcome relationship?                  | PN       | Y / PY / <u>PN</u> / N / NI                                                               |
| 7.3 ... different <i>subgroups</i> ?                                                        | PY       | Y / PY / <u>PN</u> / N / NI                                                               |
| <b>Risk of bias judgement</b>                                                               | Moderate | Low / Moderate / Serious / Critical / NI                                                  |
| Optional: What is the predicted direction of bias due to selection of the reported result?  |          | Favours experimental / Favours comparator / Towards null / Away from null / Unpredictable |

**Overall bias**

|                                                                             |                 |                                                                                                            |
|-----------------------------------------------------------------------------|-----------------|------------------------------------------------------------------------------------------------------------|
| <b>Risk of bias judgement</b>                                               | Low to moderate | Low / Moderate<br>/ Serious /<br>Critical / NI                                                             |
| Optional: What is the overall predicted direction of bias for this outcome? |                 | Favours<br>experimental /<br>Favours<br>comparator /<br>Towards null<br>/Away from null<br>/ Unpredictable |

## Kaffarnik, 2013

Responses underlined in green are potential markers for low risk of bias, and responses in **red** are potential markers for a risk of bias. Where questions relate only to sign posts to other questions, no formatting is used.

| Signalling questions                                                                                                                                                                                                                                                                                                                                                       | Description | Response options              |
|----------------------------------------------------------------------------------------------------------------------------------------------------------------------------------------------------------------------------------------------------------------------------------------------------------------------------------------------------------------------------|-------------|-------------------------------|
| <b>Bias due to confounding</b>                                                                                                                                                                                                                                                                                                                                             |             |                               |
| <p>1.1 Is there potential for confounding of the effect of intervention in this study?</p> <p><b>If <u>N/PN</u> to 1.1:</b> the study can be considered to be at low risk of bias due to confounding and no further signalling questions need be considered</p> <p><b>If <b>Y/PY</b> to 1.1:</b> determine whether there is a need to assess time-varying confounding:</p> | Y           | <b>Y / PY / <u>PN / N</u></b> |
| <p>1.2. Was the analysis based on splitting participants' follow up time according to intervention received?</p> <p><b>If <b>N/PN</b>,</b> answer questions relating to baseline confounding (1.4 to 1.6)</p> <p><b>If <b>Y/PY</b>,</b> go to question 1.3.</p>                                                                                                            | N           | NA / Y / PY / PN / N / NI     |
| <p>1.3. Were intervention discontinuations or switches likely to be related to factors that are prognostic for the outcome?</p> <p><b>If <b>N/PN</b>,</b> answer questions relating to baseline confounding (1.4 to 1.6)</p> <p><b>If <b>Y/PY</b>,</b> answer questions relating to both baseline and time-varying confounding (1.7 and 1.8)</p>                           |             | NA / Y / PY / PN / N / NI     |



| <b>Questions relating to baseline confounding only</b>                                                                                                       |          |                                                                       |
|--------------------------------------------------------------------------------------------------------------------------------------------------------------|----------|-----------------------------------------------------------------------|
| 1.4. Did the authors use an appropriate analysis method that controlled for all the important confounding domains?                                           | N        | NA / <u>Y</u> / <u>PY</u> / <u>PN</u><br>/ N / NI                     |
| 1.5. <b>If <u>Y/PY</u> to 1.4:</b> Were confounding domains that were controlled for measured validly and reliably by the variables available in this study? |          | NA / <u>Y</u> / <u>PY</u> / <u>PN</u><br>/ N / NI                     |
| 1.6. Did the authors control for any post-intervention variables that could have been affected by the intervention?                                          | Y        | NA / <u>Y</u> / <u>PY</u> / <u>PN</u><br><u>/N</u> / NI               |
| <b>Questions relating to baseline and time-varying confounding</b>                                                                                           |          |                                                                       |
| 1.7. Did the authors use an appropriate analysis method that controlled for all the important confounding domains and for time-varying confounding?          | N        | NA / <u>Y</u> / <u>PY</u> / <u>PN</u><br>/ N / NI                     |
| 1.8. <b>If <u>Y/PY</u> to 1.7:</b> Were confounding domains that were controlled for measured validly and reliably by the variables available in this study? |          | NA / <u>Y</u> / <u>PY</u> / <u>PN</u><br>/ N / NI                     |
| <b>Risk of bias judgement</b>                                                                                                                                | Critical | Low / Moderate<br>/ Serious /<br>Critical / NI                        |
| Optional: What is the predicted direction of bias due to confounding?                                                                                        |          | Favours<br>experimental /<br>Favours<br>comparator /<br>Unpredictable |

**Bias in selection of participants into the study**

|                                                                                                                                                                                                                                                                                                                                                                                                                                                                                                                        |            |                                                                                                                                         |
|------------------------------------------------------------------------------------------------------------------------------------------------------------------------------------------------------------------------------------------------------------------------------------------------------------------------------------------------------------------------------------------------------------------------------------------------------------------------------------------------------------------------|------------|-----------------------------------------------------------------------------------------------------------------------------------------|
| <p>2.1. Was selection of participants into the study (or into the analysis) based on participant characteristics observed after the start of intervention?</p> <p><b>If N/PN to 2.1:</b> go to 2.4</p> <p>2.2. <b>If Y/PY to 2.1:</b> Were the post-intervention variables that influenced selection likely to be associated with intervention?</p> <p>2.3 <b>If Y/PY to 2.2:</b> Were the post-intervention variables that influenced selection likely to be influenced by the outcome or a cause of the outcome?</p> | <p>N</p>   | <p>Y / PY / <u>PN</u> / <u>N</u> / NI</p> <p>NA / Y / PY / <u>PN</u> / <u>N</u> / NI</p> <p>NA / Y / PY / <u>PN</u> / <u>N</u> / NI</p> |
| <p>2.4. Do start of follow-up and start of intervention coincide for most participants?</p>                                                                                                                                                                                                                                                                                                                                                                                                                            | <p>Y</p>   | <p><u>Y</u> / PY / PN / N / NI</p>                                                                                                      |
| <p>2.5. <b>If Y/PY to 2.2 and 2.3, or N/PN to 2.4:</b> Were adjustment techniques used that are likely to correct for the presence of selection biases?</p>                                                                                                                                                                                                                                                                                                                                                            |            | <p>NA / <u>Y</u> / PY / PN / N / NI</p>                                                                                                 |
| <p><b>Risk of bias judgement</b></p>                                                                                                                                                                                                                                                                                                                                                                                                                                                                                   | <p>Low</p> | <p>Low / Moderate / Serious / Critical / NI</p>                                                                                         |
| <p>Optional: What is the predicted direction of bias due to selection of participants into the study?</p>                                                                                                                                                                                                                                                                                                                                                                                                              |            | <p>Favours experimental / Favours comparator / Towards null / Away from null / Unpredictable</p>                                        |

**Bias in classification of interventions**

|                                                                                                                        |     |                                                                                           |
|------------------------------------------------------------------------------------------------------------------------|-----|-------------------------------------------------------------------------------------------|
| 3.1 Were intervention groups clearly defined?                                                                          | Y   | Y / PY / PN / N / NI                                                                      |
| 3.2 Was the information used to define intervention groups recorded at the start of the intervention?                  | Y   | Y / PY / PN / N / NI                                                                      |
| 3.3 Could classification of intervention status have been affected by knowledge of the outcome or risk of the outcome? | N   | Y / PY / PN / N / NI                                                                      |
| <b>Risk of bias judgement</b>                                                                                          | Low | Low / Moderate / Serious / Critical / NI                                                  |
| Optional: What is the predicted direction of bias due to classification of interventions?                              |     | Favours experimental / Favours comparator / Towards null / Away from null / Unpredictable |

**Bias due to deviations from intended interventions**

|                                                                                                                                                 |  |                                                |
|-------------------------------------------------------------------------------------------------------------------------------------------------|--|------------------------------------------------|
| <b>If your aim for this study is to assess the effect of assignment to intervention, answer questions 4.1 and 4.2</b>                           |  |                                                |
| 4.1. Were there deviations from the intended intervention beyond what would be expected in usual practice?                                      |  | Y / PY / <u>PN</u> / <u>N</u> / NI             |
| 4.2. <b>If Y/PY to 4.1:</b> Were these deviations from intended intervention unbalanced between groups and likely to have affected the outcome? |  | NA / Y / PY / <u>PN</u> / <u>N</u> / NI        |
| <b>If your aim for this study is to assess the effect of starting and adhering to intervention, answer questions 4.3 to 4.6</b>                 |  |                                                |
| 4.3. Were important co-interventions balanced across intervention groups?                                                                       |  | <u>Y</u> / PY / <u>PN</u> / <u>N</u> / NI      |
| 4.4. Was the intervention implemented successfully for most participants?                                                                       |  | <u>Y</u> / PY / <u>PN</u> / <u>N</u> / NI      |
| 4.5. Did study participants adhere to the assigned intervention regimen?                                                                        |  | <u>Y</u> / PY / <u>PN</u> / <u>N</u> / NI      |
| 4.6. <b>If N/PN to 4.3, 4.4 or 4.5:</b> Was an appropriate analysis used to estimate the effect of starting and adhering to the intervention?   |  | NA / <u>Y</u> / PY / <u>PN</u> / <u>N</u> / NI |
| <b>Risk of bias judgement</b>                                                                                                                   |  | Low / Moderate / Serious / Critical / NI       |

|                                                                                                      |  |                                                                                           |
|------------------------------------------------------------------------------------------------------|--|-------------------------------------------------------------------------------------------|
| Optional: What is the predicted direction of bias due to deviations from the intended interventions? |  | Favours experimental / Favours comparator / Towards null / Away from null / Unpredictable |
|------------------------------------------------------------------------------------------------------|--|-------------------------------------------------------------------------------------------|

**Bias due to missing data**

|                                                                                                                                                 |     |                                                                                           |
|-------------------------------------------------------------------------------------------------------------------------------------------------|-----|-------------------------------------------------------------------------------------------|
| 5.1 Were outcome data available for all, or nearly all, participants?                                                                           | Y   | <u>Y / PY</u> / PN / N / NI                                                               |
| 5.2 Were participants excluded due to missing data on intervention status?                                                                      | PN  | Y / PY / <u>PN / N</u> / NI                                                               |
| 5.3 Were participants excluded due to missing data on other variables needed for the analysis?                                                  | PN  | Y / PY / <u>PN / N</u> / NI                                                               |
| 5.4 <b>If PN/N to 5.1, or Y/PY to 5.2 or 5.3:</b> Are the proportion of participants and reasons for missing data similar across interventions? |     | NA / <u>Y / PY</u> / PN / N / NI                                                          |
| 5.5 <b>If PN/N to 5.1, or Y/PY to 5.2 or 5.3:</b> Is there evidence that results were robust to the presence of missing data?                   |     | NA / <u>Y / PY</u> / PN / N / NI                                                          |
| <b>Risk of bias judgement</b>                                                                                                                   | Low | Low / Moderate / Serious / Critical / NI                                                  |
| Optional: What is the predicted direction of bias due to missing data?                                                                          |     | Favours experimental / Favours comparator / Towards null / Away from null / Unpredictable |

**Bias in measurement of outcomes**

|                                                                                                |          |                                                                                           |
|------------------------------------------------------------------------------------------------|----------|-------------------------------------------------------------------------------------------|
| 6.1 Could the outcome measure have been influenced by knowledge of the intervention received?  | N        | Y / PY / <u>PN / N</u> / NI                                                               |
| 6.2 Were outcome assessors aware of the intervention received by study participants?           | Y        | Y / PY / <u>PN / N</u> / NI                                                               |
| 6.3 Were the methods of outcome assessment comparable across intervention groups?              | Y        | <u>Y / PY</u> / PN / N / NI                                                               |
| 6.4 Were any systematic errors in measurement of the outcome related to intervention received? | PN       | Y / PY / <u>PN / N</u> / NI                                                               |
| <b>Risk of bias judgement</b>                                                                  | Moderate | Low / Moderate / Serious / Critical / NI                                                  |
| Optional: What is the predicted direction of bias due to measurement of outcomes?              |          | Favours experimental / Favours comparator / Towards null / Away from null / Unpredictable |

**Bias in selection of the reported result**

|                                                                                             |         |                                                                                           |
|---------------------------------------------------------------------------------------------|---------|-------------------------------------------------------------------------------------------|
| Is the reported effect estimate likely to be selected, on the basis of the results, from... |         |                                                                                           |
| 7.1. ... multiple outcome <i>measurements</i> within the outcome domain?                    | PY      | Y / PY / <u>PN / N</u> / NI                                                               |
| 7.2 ... multiple <i>analyses</i> of the intervention-outcome relationship?                  | PN      | Y / PY / <u>PN / N</u> / NI                                                               |
| 7.3 ... different <i>subgroups</i> ?                                                        | PY      | Y / PY / <u>PN / N</u> / NI                                                               |
| <b>Risk of bias judgement</b>                                                               | Serious | Low / Moderate / Serious / Critical / NI                                                  |
| Optional: What is the predicted direction of bias due to selection of the reported result?  |         | Favours experimental / Favours comparator / Towards null / Away from null / Unpredictable |



**Overall bias**

|                                                                             |         |                                                                                           |
|-----------------------------------------------------------------------------|---------|-------------------------------------------------------------------------------------------|
| <b>Risk of bias judgement</b>                                               | Serious | Low / Moderate / Serious / Critical / NI                                                  |
| Optional: What is the overall predicted direction of bias for this outcome? |         | Favours experimental / Favours comparator / Towards null / Away from null / Unpredictable |

## Keh, 2016

### Study details

#### Reference

Keh D, Trips E, Marx G, et al. Effect of Hydrocortisone on Development of Shock Among Patients With Severe Sepsis: The HYPRESS Randomized Clinical Trial. JAMA. 2016;316(17):1775–1785.

### Study design

- Individually-randomized parallel-group trial
- Cluster-randomized parallel-group trial
- Individually randomized cross-over (or other matched) trial

### For the purposes of this assessment, the interventions being compared are defined as

Experimental:  Comparator:

### Specify which outcome is being assessed for risk of bias

**Specify the numerical result being assessed.** In case of multiple alternative analyses being presented, specify the numeric result (e.g. RR = 1.52 (95% CI 0.83 to 2.77) and/or a reference (e.g. to a table, figure or paragraph) that uniquely defines the result being assessed.

### Is the review team's aim for this result...?

- to assess the effect of *assignment to intervention* (the 'intention-to-treat' effect)
- to assess the effect of *adhering to intervention* (the 'per-protocol' effect)

**If the aim is to assess the effect of adhering to intervention**, select the deviations from intended intervention that should be addressed (at least one must be checked):

- occurrence of non-protocol interventions
- failures in implementing the intervention that could have affected the outcome
- non-adherence to their assigned intervention by trial participants

**Which of the following sources were obtained to help inform the risk-of-bias assessment? (tick as many as apply)**

- Journal article(s) with results of the trial
- X Trial protocol
- X Statistical analysis plan (SAP)
- X Non-commercial trial registry record (e.g. ClinicalTrials.gov record)
- Company-owned trial registry record (e.g. GSK Clinical Study Register record)
- "Grey literature" (e.g. unpublished thesis)
- Conference abstract(s) about the trial
- Regulatory document (e.g. Clinical Study Report, Drug Approval Package)
- Research ethics application
- Grant database summary (e.g. NIH RePORTER or Research Councils UK Gateway to Research)
- Personal communication with trialist
- Personal communication with the sponsor

Risk of bias assessment

Responses underlined in green are potential markers for low risk of bias, and responses in **red** are potential markers for a risk of bias. Where questions relate only to sign posts to other questions, no formatting is used.

### Domain 1: Risk of bias arising from the randomization process

| Signalling questions                                                                                       | Comments | Response options                                                                               |
|------------------------------------------------------------------------------------------------------------|----------|------------------------------------------------------------------------------------------------|
| 1.1 Was the allocation sequence random?                                                                    | Y        | <u>Y</u> / PY / PN / N / NI                                                                    |
| 1.2 Was the allocation sequence concealed until participants were enrolled and assigned to interventions?  | PY       | <u>Y</u> / PY / PN / N / NI                                                                    |
| 1.3 Did baseline differences between intervention groups suggest a problem with the randomization process? | N        | Y / PY / <u>PN</u> / N / NI                                                                    |
| Risk-of-bias judgement                                                                                     | Low      | Low / High / Some concerns                                                                     |
| Optional: What is the predicted direction of bias arising from the randomization process?                  |          | NA / Favours experimental / Favours comparator / Towards null / Away from null / Unpredictable |

Domain 2: Risk of bias due to deviations from the intended interventions (*effect of assignment to intervention*)

| Signalling questions                                                                                                                                                          | Comments | Response options                 |
|-------------------------------------------------------------------------------------------------------------------------------------------------------------------------------|----------|----------------------------------|
| 2.1. Were participants aware of their assigned intervention during the trial?                                                                                                 | N        | Y / PY / <u>PN / N</u> / NI      |
| 2.2. Were carers and people delivering the interventions aware of participants' assigned intervention during the trial?                                                       | N        | Y / PY / <u>PN / N</u> / NI      |
| 2.3. <u>If Y/PY/NI to 2.1 or 2.2:</u> Were there deviations from the intended intervention that arose because of the trial context?                                           |          | NA / Y / PY / <u>PN / N</u> / NI |
| 2.4 <u>If Y/PY to 2.3:</u> Were these deviations likely to have affected the outcome?                                                                                         |          | NA / Y / PY / <u>PN / N</u> / NI |
| 2.5. <u>If Y/PY/NI to 2.4:</u> Were these deviations from intended intervention balanced between groups?                                                                      |          | NA / <u>Y / PY</u> / PN / N / NI |
| 2.6 Was an appropriate analysis used to estimate the effect of assignment to intervention?                                                                                    | Y        | <u>Y / PY</u> / PN / N / NI      |
| 2.7 <u>If N/PN/NI to 2.6:</u> Was there potential for a substantial impact (on the result) of the failure to analyse participants in the group to which they were randomized? |          | NA / Y / PY / <u>PN / N</u> / NI |
| Risk-of-bias judgement                                                                                                                                                        | Low      | Low / High / Some concerns       |

|                                                                                                  |  |                                                                                                |
|--------------------------------------------------------------------------------------------------|--|------------------------------------------------------------------------------------------------|
| Optional: What is the predicted direction of bias due to deviations from intended interventions? |  | NA / Favours experimental / Favours comparator / Towards null / Away from null / Unpredictable |
|--------------------------------------------------------------------------------------------------|--|------------------------------------------------------------------------------------------------|

Domain 3: Missing outcome data

| Signalling questions                                                                                    | Comments | Response options                                                                               |
|---------------------------------------------------------------------------------------------------------|----------|------------------------------------------------------------------------------------------------|
| 3.1 Were data for this outcome available for all, or nearly all, participants randomized?               | Y        | <u>Y</u> / PY / PN / N / NI                                                                    |
| 3.2 If <u>N/PN/NI</u> to 3.1: Is there evidence that the result was not biased by missing outcome data? |          | NA / <u>Y</u> / PY / PN / N                                                                    |
| 3.3 If <u>N/PN</u> to 3.2: Could missingness in the outcome depend on its true value?                   |          | NA / Y / PY / <u>PN</u> / N / NI                                                               |
| 3.4 If <u>Y/PY/NI</u> to 3.3: Is it likely that missingness in the outcome depended on its true value?  |          | NA / Y / PY / <u>PN</u> / N / NI                                                               |
| Risk-of-bias judgement                                                                                  | Low      | Low / High / Some concerns                                                                     |
| Optional: What is the predicted direction of bias due to missing outcome data?                          |          | NA / Favours experimental / Favours comparator / Towards null / Away from null / Unpredictable |

Domain 4: Risk of bias in measurement of the outcome

| Signalling questions                                                                                                            | Comments | Response options                                                                               |
|---------------------------------------------------------------------------------------------------------------------------------|----------|------------------------------------------------------------------------------------------------|
| 4.1 Was the method of measuring the outcome inappropriate?                                                                      | N        | Y / PY / <u>PN / N</u> / NI                                                                    |
| 4.2 Could measurement or ascertainment of the outcome have differed between intervention groups?                                | N        | Y / PY / <u>PN / N</u> / NI                                                                    |
| 4.3 If <u>N/PN/NI</u> to 4.1 and 4.2: Were outcome assessors aware of the intervention received by study participants?          | Y        | NA / Y / PY / <u>PN / N</u> / NI                                                               |
| 4.4 If <u>Y/PY/NI</u> to 4.3: Could assessment of the outcome have been influenced by knowledge of intervention received?       |          | NA / Y / PY / <u>PN / N</u> / NI                                                               |
| 4.5 If <u>Y/PY/NI</u> to 4.4: Is it likely that assessment of the outcome was influenced by knowledge of intervention received? |          | NA / Y / PY / <u>PN / N</u> / NI                                                               |
| <b>Risk-of-bias judgement</b>                                                                                                   | Low      | Low / High / Some concerns                                                                     |
| Optional: What is the predicted direction of bias in measurement of the outcome?                                                |          | NA / Favours experimental / Favours comparator / Towards null / Away from null / Unpredictable |



Domain 5: Risk of bias in selection of the reported result

| Signalling questions                                                                                                                                                                | Comments | Response options                                                                               |
|-------------------------------------------------------------------------------------------------------------------------------------------------------------------------------------|----------|------------------------------------------------------------------------------------------------|
| 5.1 Were the data that produced this result analysed in accordance with a pre-specified analysis plan that was finalized before unblinded outcome data were available for analysis? | Y        | Y / PY / PN / N / NI                                                                           |
| Is the numerical result being assessed likely to have been selected, on the basis of the results, from...                                                                           |          |                                                                                                |
| 5.2. ... multiple eligible outcome measurements (e.g. scales, definitions, time points) within the outcome domain?                                                                  | N        | Y / PY / PN / N / NI                                                                           |
| 5.3 ... multiple eligible analyses of the data?                                                                                                                                     | PN       | Y / PY / PN / N / NI                                                                           |
| <b>Risk-of-bias judgement</b>                                                                                                                                                       | Low      | Low / High / Some concerns                                                                     |
| Optional: What is the predicted direction of bias due to selection of the reported result?                                                                                          |          | NA / Favours experimental / Favours comparator / Towards null / Away from null / Unpredictable |

Overall risk of bias

|                                                                             |     |                                                                                                |
|-----------------------------------------------------------------------------|-----|------------------------------------------------------------------------------------------------|
| <b>Risk-of-bias judgement</b>                                               | Low | Low / High / Some concerns                                                                     |
| Optional: What is the overall predicted direction of bias for this outcome? |     | NA / Favours experimental / Favours comparator / Towards null / Away from null / Unpredictable |

## Koch, 2010

Responses underlined in green are potential markers for low risk of bias, and responses in **red** are potential markers for a risk of bias. Where questions relate only to sign posts to other questions, no formatting is used.

| Signalling questions                                                                                                                                                                                                                                                                                                                                                       | Description | Response options              |
|----------------------------------------------------------------------------------------------------------------------------------------------------------------------------------------------------------------------------------------------------------------------------------------------------------------------------------------------------------------------------|-------------|-------------------------------|
| <b>Bias due to confounding</b>                                                                                                                                                                                                                                                                                                                                             |             |                               |
| <p>1.1 Is there potential for confounding of the effect of intervention in this study?</p> <p><b>If <u>N/PN</u> to 1.1:</b> the study can be considered to be at low risk of bias due to confounding and no further signalling questions need be considered</p> <p><b>If <b>Y/PY</b> to 1.1:</b> determine whether there is a need to assess time-varying confounding:</p> | Y           | <b>Y / PY</b> / <u>PN / N</u> |
| <p>1.2. Was the analysis based on splitting participants' follow up time according to intervention received?</p> <p><b>If N/PN</b>, answer questions relating to baseline confounding (1.4 to 1.6)</p> <p><b>If Y/PY</b>, go to question 1.3.</p>                                                                                                                          | N           | NA / Y / PY / PN / N / NI     |
| <p>1.3. Were intervention discontinuations or switches likely to be related to factors that are prognostic for the outcome?</p> <p><b>If N/PN</b>, answer questions relating to baseline confounding (1.4 to 1.6)</p> <p><b>If Y/PY</b>, answer questions relating to both baseline and time-varying confounding (1.7 and 1.8)</p>                                         |             | NA / Y / PY / PN / N / NI     |

|                                                                                                                                                              |         |                                                                       |
|--------------------------------------------------------------------------------------------------------------------------------------------------------------|---------|-----------------------------------------------------------------------|
| <b>Questions relating to baseline confounding only</b>                                                                                                       |         |                                                                       |
| 1.4. Did the authors use an appropriate analysis method that controlled for all the important confounding domains?                                           | N       | NA / <u>Y</u> / <u>PY</u> / <u>PN</u><br>/ N / NI                     |
| 1.5. <b>If <u>Y/PY</u> to 1.4:</b> Were confounding domains that were controlled for measured validly and reliably by the variables available in this study? |         | NA / <u>Y</u> / <u>PY</u> / <u>PN</u><br>/ N / NI                     |
| 1.6. Did the authors control for any post-intervention variables that could have been affected by the intervention?                                          | N       | NA / <u>Y</u> / <u>PY</u> / <u>PN</u><br><u>/N</u> / NI               |
| <b>Questions relating to baseline and time-varying confounding</b>                                                                                           |         |                                                                       |
| 1.7. Did the authors use an appropriate analysis method that controlled for all the important confounding domains and for time-varying confounding?          | N       | NA / <u>Y</u> / <u>PY</u> / <u>PN</u><br>/ N / NI                     |
| 1.8. <b>If <u>Y/PY</u> to 1.7:</b> Were confounding domains that were controlled for measured validly and reliably by the variables available in this study? |         | NA / <u>Y</u> / <u>PY</u> / <u>PN</u><br>/ N / NI                     |
| <b>Risk of bias judgement</b>                                                                                                                                | Serious | Low / Moderate<br>/ Serious /<br>Critical / NI                        |
| Optional: What is the predicted direction of bias due to confounding?                                                                                        |         | Favours<br>experimental /<br>Favours<br>comparator /<br>Unpredictable |

**Bias in selection of participants into the study**

|                                                                                                                                                                                                                                                                                                                                                                                                                                                                                                                        |            |                                                                                                                                         |
|------------------------------------------------------------------------------------------------------------------------------------------------------------------------------------------------------------------------------------------------------------------------------------------------------------------------------------------------------------------------------------------------------------------------------------------------------------------------------------------------------------------------|------------|-----------------------------------------------------------------------------------------------------------------------------------------|
| <p>2.1. Was selection of participants into the study (or into the analysis) based on participant characteristics observed after the start of intervention?</p> <p><b>If N/PN to 2.1:</b> go to 2.4</p> <p>2.2. <b>If Y/PY to 2.1:</b> Were the post-intervention variables that influenced selection likely to be associated with intervention?</p> <p>2.3 <b>If Y/PY to 2.2:</b> Were the post-intervention variables that influenced selection likely to be influenced by the outcome or a cause of the outcome?</p> | <p>N</p>   | <p>Y / PY / <u>PN</u> / <u>N</u> / NI</p> <p>NA / Y / PY / <u>PN</u> / <u>N</u> / NI</p> <p>NA / Y / PY / <u>PN</u> / <u>N</u> / NI</p> |
| <p>2.4. Do start of follow-up and start of intervention coincide for most participants?</p>                                                                                                                                                                                                                                                                                                                                                                                                                            | <p>Y</p>   | <p><u>Y</u> / PY / PN / N / NI</p>                                                                                                      |
| <p>2.5. <b>If Y/PY to 2.2 and 2.3, or N/PN to 2.4:</b> Were adjustment techniques used that are likely to correct for the presence of selection biases?</p>                                                                                                                                                                                                                                                                                                                                                            |            | <p>NA / <u>Y</u> / PY / PN / N / NI</p>                                                                                                 |
| <p><b>Risk of bias judgement</b></p>                                                                                                                                                                                                                                                                                                                                                                                                                                                                                   | <p>Low</p> | <p>Low / Moderate / Serious / Critical / NI</p>                                                                                         |
| <p>Optional: What is the predicted direction of bias due to selection of participants into the study?</p>                                                                                                                                                                                                                                                                                                                                                                                                              |            | <p>Favours experimental / Favours comparator / Towards null / Away from null / Unpredictable</p>                                        |

**Bias in classification of interventions**

|                                                                                                                        |     |                                                                                           |
|------------------------------------------------------------------------------------------------------------------------|-----|-------------------------------------------------------------------------------------------|
| 3.1 Were intervention groups clearly defined?                                                                          | Y   | Y / PY / PN / N / NI                                                                      |
| 3.2 Was the information used to define intervention groups recorded at the start of the intervention?                  | Y   | Y / PY / PN / N / NI                                                                      |
| 3.3 Could classification of intervention status have been affected by knowledge of the outcome or risk of the outcome? | PN  | Y / PY / PN / N / NI                                                                      |
| <b>Risk of bias judgement</b>                                                                                          | Low | Low / Moderate / Serious / Critical / NI                                                  |
| Optional: What is the predicted direction of bias due to classification of interventions?                              |     | Favours experimental / Favours comparator / Towards null / Away from null / Unpredictable |

**Bias due to deviations from intended interventions**

|                                                                                                                                                 |  |                                                |
|-------------------------------------------------------------------------------------------------------------------------------------------------|--|------------------------------------------------|
| <b>If your aim for this study is to assess the effect of assignment to intervention, answer questions 4.1 and 4.2</b>                           |  |                                                |
| 4.1. Were there deviations from the intended intervention beyond what would be expected in usual practice?                                      |  | Y / PY / <u>PN</u> / <u>N</u> / NI             |
| 4.2. <b>If Y/PY to 4.1:</b> Were these deviations from intended intervention unbalanced between groups and likely to have affected the outcome? |  | NA / Y / PY / <u>PN</u> / <u>N</u> / NI        |
| <b>If your aim for this study is to assess the effect of starting and adhering to intervention, answer questions 4.3 to 4.6</b>                 |  |                                                |
| 4.3. Were important co-interventions balanced across intervention groups?                                                                       |  | <u>Y</u> / PY / <u>PN</u> / <u>N</u> / NI      |
| 4.4. Was the intervention implemented successfully for most participants?                                                                       |  | <u>Y</u> / PY / <u>PN</u> / <u>N</u> / NI      |
| 4.5. Did study participants adhere to the assigned intervention regimen?                                                                        |  | <u>Y</u> / PY / <u>PN</u> / <u>N</u> / NI      |
| 4.6. <b>If N/PN to 4.3, 4.4 or 4.5:</b> Was an appropriate analysis used to estimate the effect of starting and adhering to the intervention?   |  | NA / <u>Y</u> / PY / <u>PN</u> / <u>N</u> / NI |
| <b>Risk of bias judgement</b>                                                                                                                   |  | Low / Moderate / Serious / Critical / NI       |

|                                                                                                      |  |                                                                                                      |
|------------------------------------------------------------------------------------------------------|--|------------------------------------------------------------------------------------------------------|
| Optional: What is the predicted direction of bias due to deviations from the intended interventions? |  | Favours experimental /<br>Favours comparator /<br>Towards null<br>/Away from null<br>/ Unpredictable |
|------------------------------------------------------------------------------------------------------|--|------------------------------------------------------------------------------------------------------|



**Bias due to missing data**

|                                                                                                                                                 |          |                                                                                           |
|-------------------------------------------------------------------------------------------------------------------------------------------------|----------|-------------------------------------------------------------------------------------------|
| 5.1 Were outcome data available for all, or nearly all, participants?                                                                           | PY       | <u>Y / PY</u> / PN / N / NI                                                               |
| 5.2 Were participants excluded due to missing data on intervention status?                                                                      | PN       | Y / PY / <u>PN / N</u> / NI                                                               |
| 5.3 Were participants excluded due to missing data on other variables needed for the analysis?                                                  | PN       | Y / PY / <u>PN / N</u> / NI                                                               |
| 5.4 <b>If PN/N to 5.1, or Y/PY to 5.2 or 5.3:</b> Are the proportion of participants and reasons for missing data similar across interventions? |          | NA / <u>Y / PY</u> / PN / N / NI                                                          |
| 5.5 <b>If PN/N to 5.1, or Y/PY to 5.2 or 5.3:</b> Is there evidence that results were robust to the presence of missing data?                   |          | NA / <u>Y / PY</u> / PN / N / NI                                                          |
| <b>Risk of bias judgement</b>                                                                                                                   | Moderate | Low / Moderate / Serious / Critical / NI                                                  |
| Optional: What is the predicted direction of bias due to missing data?                                                                          |          | Favours experimental / Favours comparator / Towards null / Away from null / Unpredictable |

**Bias in measurement of outcomes**

|                                                                                                |     |                                                                                           |
|------------------------------------------------------------------------------------------------|-----|-------------------------------------------------------------------------------------------|
| 6.1 Could the outcome measure have been influenced by knowledge of the intervention received?  | N   | Y / PY / <u>PN / N</u> / NI                                                               |
| 6.2 Were outcome assessors aware of the intervention received by study participants?           | Y   | Y / PY / <u>PN / N</u> / NI                                                               |
| 6.3 Were the methods of outcome assessment comparable across intervention groups?              | Y   | <u>Y / PY</u> / PN / N / NI                                                               |
| 6.4 Were any systematic errors in measurement of the outcome related to intervention received? | N   | Y / PY / <u>PN / N</u> / NI                                                               |
| <b>Risk of bias judgement</b>                                                                  | Low | Low / Moderate / Serious / Critical / NI                                                  |
| Optional: What is the predicted direction of bias due to measurement of outcomes?              |     | Favours experimental / Favours comparator / Towards null / Away from null / Unpredictable |

**Bias in selection of the reported result**

|                                                                                             |     |                                                                                           |
|---------------------------------------------------------------------------------------------|-----|-------------------------------------------------------------------------------------------|
| Is the reported effect estimate likely to be selected, on the basis of the results, from... |     |                                                                                           |
| 7.1. ... multiple outcome <i>measurements</i> within the outcome domain?                    | N   | Y / PY / <u>PN</u> / N / NI                                                               |
| 7.2 ... multiple <i>analyses</i> of the intervention-outcome relationship?                  | N   | Y / PY / <u>PN</u> / N / NI                                                               |
| 7.3 ... different <i>subgroups</i> ?                                                        | PN  | Y / PY / <u>PN</u> / N / NI                                                               |
| <b>Risk of bias judgement</b>                                                               | Low | Low / Moderate / Serious / Critical / NI                                                  |
| Optional: What is the predicted direction of bias due to selection of the reported result?  |     | Favours experimental / Favours comparator / Towards null / Away from null / Unpredictable |

**Overall bias**

|                                                                             |     |                                                                                           |
|-----------------------------------------------------------------------------|-----|-------------------------------------------------------------------------------------------|
| <b>Risk of bias judgement</b>                                               | Low | Low / Moderate / Serious / Critical / NI                                                  |
| Optional: What is the overall predicted direction of bias for this outcome? |     | Favours experimental / Favours comparator / Towards null / Away from null / Unpredictable |

## Kristof, 2018

Responses underlined in green are potential markers for low risk of bias, and responses in **red** are potential markers for a risk of bias. Where questions relate only to sign posts to other questions, no formatting is used.

| Signalling questions                                                                                                                                                                                                                                                                                                                                                       | Description | Response options              |
|----------------------------------------------------------------------------------------------------------------------------------------------------------------------------------------------------------------------------------------------------------------------------------------------------------------------------------------------------------------------------|-------------|-------------------------------|
| <b>Bias due to confounding</b>                                                                                                                                                                                                                                                                                                                                             |             |                               |
| <p>1.1 Is there potential for confounding of the effect of intervention in this study?</p> <p><b>If <u>N/PN</u> to 1.1:</b> the study can be considered to be at low risk of bias due to confounding and no further signalling questions need be considered</p> <p><b>If <b>Y/PY</b> to 1.1:</b> determine whether there is a need to assess time-varying confounding:</p> | Y           | <b>Y / PY</b> / <u>PN / N</u> |
| <p>1.2. Was the analysis based on splitting participants' follow up time according to intervention received?</p> <p><b>If <b>N/PN</b>,</b> answer questions relating to baseline confounding (1.4 to 1.6)</p> <p><b>If <b>Y/PY</b>,</b> go to question 1.3.</p>                                                                                                            | N           | NA / Y / PY / PN / N / NI     |
| <p>1.3. Were intervention discontinuations or switches likely to be related to factors that are prognostic for the outcome?</p> <p><b>If <b>N/PN</b>,</b> answer questions relating to baseline confounding (1.4 to 1.6)</p> <p><b>If <b>Y/PY</b>,</b> answer questions relating to both baseline and time-varying confounding (1.7 and 1.8)</p>                           |             | NA / Y / PY / PN / N / NI     |

| <b>Questions relating to baseline confounding only</b>                                                                                                       |          |                                                                       |
|--------------------------------------------------------------------------------------------------------------------------------------------------------------|----------|-----------------------------------------------------------------------|
| 1.4. Did the authors use an appropriate analysis method that controlled for all the important confounding domains?                                           | PY       | NA / <u>Y</u> / <u>PY</u> / <u>PN</u><br>/ N / NI                     |
| 1.5. <b>If <u>Y/PY</u> to 1.4:</b> Were confounding domains that were controlled for measured validly and reliably by the variables available in this study? | PY       | NA / <u>Y</u> / <u>PY</u> / <u>PN</u><br>/ N / NI                     |
| 1.6. Did the authors control for any post-intervention variables that could have been affected by the intervention?                                          | N        | NA / <u>Y</u> / <u>PY</u> / <u>PN</u><br><u>/N</u> / NI               |
| <b>Questions relating to baseline and time-varying confounding</b>                                                                                           |          |                                                                       |
| 1.7. Did the authors use an appropriate analysis method that controlled for all the important confounding domains and for time-varying confounding?          | PY       | NA / <u>Y</u> / <u>PY</u> / <u>PN</u><br>/ N / NI                     |
| 1.8. <b>If <u>Y/PY</u> to 1.7:</b> Were confounding domains that were controlled for measured validly and reliably by the variables available in this study? | Y        | NA / <u>Y</u> / <u>PY</u> / <u>PN</u><br>/ N / NI                     |
| <b>Risk of bias judgement</b>                                                                                                                                | Moderate | Low / Moderate<br>/ Serious /<br>Critical / NI                        |
| Optional: What is the predicted direction of bias due to confounding?                                                                                        |          | Favours<br>experimental /<br>Favours<br>comparator /<br>Unpredictable |

**Bias in selection of participants into the study**

|                                                                                                                                                                                                                                                                                                                                                                                                                                                                                                                        |            |                                                                                                                                         |
|------------------------------------------------------------------------------------------------------------------------------------------------------------------------------------------------------------------------------------------------------------------------------------------------------------------------------------------------------------------------------------------------------------------------------------------------------------------------------------------------------------------------|------------|-----------------------------------------------------------------------------------------------------------------------------------------|
| <p>2.1. Was selection of participants into the study (or into the analysis) based on participant characteristics observed after the start of intervention?</p> <p><b>If N/PN to 2.1:</b> go to 2.4</p> <p>2.2. <b>If Y/PY to 2.1:</b> Were the post-intervention variables that influenced selection likely to be associated with intervention?</p> <p>2.3 <b>If Y/PY to 2.2:</b> Were the post-intervention variables that influenced selection likely to be influenced by the outcome or a cause of the outcome?</p> | <p>N</p>   | <p>Y / PY / <u>PN</u> / <u>N</u> / NI</p> <p>NA / Y / PY / <u>PN</u> / <u>N</u> / NI</p> <p>NA / Y / PY / <u>PN</u> / <u>N</u> / NI</p> |
| <p>2.4. Do start of follow-up and start of intervention coincide for most participants?</p>                                                                                                                                                                                                                                                                                                                                                                                                                            | <p>Y</p>   | <p><u>Y</u> / PY / PN / N / NI</p>                                                                                                      |
| <p>2.5. <b>If Y/PY to 2.2 and 2.3, or N/PN to 2.4:</b> Were adjustment techniques used that are likely to correct for the presence of selection biases?</p>                                                                                                                                                                                                                                                                                                                                                            |            | <p>NA / <u>Y</u> / PY / PN / N / NI</p>                                                                                                 |
| <p><b>Risk of bias judgement</b></p>                                                                                                                                                                                                                                                                                                                                                                                                                                                                                   | <p>Low</p> | <p>Low / Moderate / Serious / Critical / NI</p>                                                                                         |
| <p>Optional: What is the predicted direction of bias due to selection of participants into the study?</p>                                                                                                                                                                                                                                                                                                                                                                                                              |            | <p>Favours experimental / Favours comparator / Towards null / Away from null / Unpredictable</p>                                        |

**Bias in classification of interventions**

|                                                                                                                        |     |                                                                                           |
|------------------------------------------------------------------------------------------------------------------------|-----|-------------------------------------------------------------------------------------------|
| 3.1 Were intervention groups clearly defined?                                                                          | Y   | Y / PY / PN / N / NI                                                                      |
| 3.2 Was the information used to define intervention groups recorded at the start of the intervention?                  | Y   | Y / PY / PN / N / NI                                                                      |
| 3.3 Could classification of intervention status have been affected by knowledge of the outcome or risk of the outcome? | N   | Y / PY / PN / N / NI                                                                      |
| <b>Risk of bias judgement</b>                                                                                          | Low | Low / Moderate / Serious / Critical / NI                                                  |
| Optional: What is the predicted direction of bias due to classification of interventions?                              |     | Favours experimental / Favours comparator / Towards null / Away from null / Unpredictable |



**Bias due to deviations from intended interventions**

|                                                                                                                                                 |  |                                                |
|-------------------------------------------------------------------------------------------------------------------------------------------------|--|------------------------------------------------|
| <b>If your aim for this study is to assess the effect of assignment to intervention, answer questions 4.1 and 4.2</b>                           |  |                                                |
| 4.1. Were there deviations from the intended intervention beyond what would be expected in usual practice?                                      |  | Y / PY / <u>PN</u> / <u>N</u> / NI             |
| 4.2. <b>If Y/PY to 4.1:</b> Were these deviations from intended intervention unbalanced between groups and likely to have affected the outcome? |  | NA / Y / PY / <u>PN</u> / <u>N</u> / NI        |
| <b>If your aim for this study is to assess the effect of starting and adhering to intervention, answer questions 4.3 to 4.6</b>                 |  |                                                |
| 4.3. Were important co-interventions balanced across intervention groups?                                                                       |  | <u>Y</u> / PY / <u>PN</u> / <u>N</u> / NI      |
| 4.4. Was the intervention implemented successfully for most participants?                                                                       |  | <u>Y</u> / PY / <u>PN</u> / <u>N</u> / NI      |
| 4.5. Did study participants adhere to the assigned intervention regimen?                                                                        |  | <u>Y</u> / PY / <u>PN</u> / <u>N</u> / NI      |
| 4.6. <b>If N/PN to 4.3, 4.4 or 4.5:</b> Was an appropriate analysis used to estimate the effect of starting and adhering to the intervention?   |  | NA / <u>Y</u> / PY / <u>PN</u> / <u>N</u> / NI |
| <b>Risk of bias judgement</b>                                                                                                                   |  | Low / Moderate / Serious / Critical / NI       |

|                                                                                                      |  |                                                                                                      |
|------------------------------------------------------------------------------------------------------|--|------------------------------------------------------------------------------------------------------|
| Optional: What is the predicted direction of bias due to deviations from the intended interventions? |  | Favours experimental /<br>Favours comparator /<br>Towards null<br>/Away from null<br>/ Unpredictable |
|------------------------------------------------------------------------------------------------------|--|------------------------------------------------------------------------------------------------------|

**Bias due to missing data**

|                                                                                                                                                 |     |                                                                                           |
|-------------------------------------------------------------------------------------------------------------------------------------------------|-----|-------------------------------------------------------------------------------------------|
| 5.1 Were outcome data available for all, or nearly all, participants?                                                                           | PY  | <u>Y / PY</u> / PN / N / NI                                                               |
| 5.2 Were participants excluded due to missing data on intervention status?                                                                      | PN  | Y / PY / <u>PN / N</u> / NI                                                               |
| 5.3 Were participants excluded due to missing data on other variables needed for the analysis?                                                  | PN  | Y / PY / <u>PN / N</u> / NI                                                               |
| 5.4 <b>If PN/N to 5.1, or Y/PY to 5.2 or 5.3:</b> Are the proportion of participants and reasons for missing data similar across interventions? |     | NA / <u>Y / PY</u> / PN / N / NI                                                          |
| 5.5 <b>If PN/N to 5.1, or Y/PY to 5.2 or 5.3:</b> Is there evidence that results were robust to the presence of missing data?                   |     | NA / <u>Y / PY</u> / PN / N / NI                                                          |
| <b>Risk of bias judgement</b>                                                                                                                   | Low | Low / Moderate / Serious / Critical / NI                                                  |
| Optional: What is the predicted direction of bias due to missing data?                                                                          |     | Favours experimental / Favours comparator / Towards null / Away from null / Unpredictable |

**Bias in measurement of outcomes**

|                                                                                                |          |                                                                                           |
|------------------------------------------------------------------------------------------------|----------|-------------------------------------------------------------------------------------------|
| 6.1 Could the outcome measure have been influenced by knowledge of the intervention received?  | N        | Y / PY / <u>PN / N</u> / NI                                                               |
| 6.2 Were outcome assessors aware of the intervention received by study participants?           | Y        | Y / PY / <u>PN / N</u> / NI                                                               |
| 6.3 Were the methods of outcome assessment comparable across intervention groups?              | Y        | <u>Y / PY</u> / PN / N / NI                                                               |
| 6.4 Were any systematic errors in measurement of the outcome related to intervention received? | N        | Y / PY / <u>PN / N</u> / NI                                                               |
| <b>Risk of bias judgement</b>                                                                  | Moderate | Low / Moderate / Serious / Critical / NI                                                  |
| Optional: What is the predicted direction of bias due to measurement of outcomes?              |          | Favours experimental / Favours comparator / Towards null / Away from null / Unpredictable |

**Bias in selection of the reported result**

|                                                                                             |     |                                                                                           |
|---------------------------------------------------------------------------------------------|-----|-------------------------------------------------------------------------------------------|
| Is the reported effect estimate likely to be selected, on the basis of the results, from... |     |                                                                                           |
| 7.1. ... multiple outcome <i>measurements</i> within the outcome domain?                    | N   | Y / PY / <u>PN</u> / N / NI                                                               |
| 7.2 ... multiple <i>analyses</i> of the intervention-outcome relationship?                  | PN  | Y / PY / <u>PN</u> / N / NI                                                               |
| 7.3 ... different <i>subgroups</i> ?                                                        | N   | Y / PY / <u>PN</u> / N / NI                                                               |
| <b>Risk of bias judgement</b>                                                               | Low | Low / Moderate / Serious / Critical / NI                                                  |
| Optional: What is the predicted direction of bias due to selection of the reported result?  |     | Favours experimental / Favours comparator / Towards null / Away from null / Unpredictable |

**Overall bias**

|                                                                             |          |                                                                                                            |
|-----------------------------------------------------------------------------|----------|------------------------------------------------------------------------------------------------------------|
| <b>Risk of bias judgement</b>                                               | Moderate | Low / Moderate<br>/ Serious /<br>Critical / NI                                                             |
| Optional: What is the overall predicted direction of bias for this outcome? |          | Favours<br>experimental /<br>Favours<br>comparator /<br>Towards null<br>/Away from null<br>/ Unpredictable |

## Mansur, 2015a

Impact of statin therapy on mortality in patients with sepsis-associated acute respiratory distress syndrome (ARDS) depends on ARDS severity: a prospective observational cohort study.

Responses underlined in green are potential markers for low risk of bias, and responses in **red** are potential markers for a risk of bias. Where questions relate only to sign posts to other questions, no formatting is used.

| Signalling questions                                                                                                                                                                                                                                                                                                                                                       | Description | Response options              |
|----------------------------------------------------------------------------------------------------------------------------------------------------------------------------------------------------------------------------------------------------------------------------------------------------------------------------------------------------------------------------|-------------|-------------------------------|
| <b>Bias due to confounding</b>                                                                                                                                                                                                                                                                                                                                             |             |                               |
| <p>1.1 Is there potential for confounding of the effect of intervention in this study?</p> <p><b>If <u>N/PN</u> to 1.1:</b> the study can be considered to be at low risk of bias due to confounding and no further signalling questions need be considered</p> <p><b>If <b>Y/PY</b> to 1.1:</b> determine whether there is a need to assess time-varying confounding:</p> | PY          | <b>Y / PY / <u>PN / N</u></b> |
| <p>1.2. Was the analysis based on splitting participants' follow up time according to intervention received?</p> <p><b>If N/PN</b>, answer questions relating to baseline confounding (1.4 to 1.6)</p> <p><b>If Y/PY</b>, go to question 1.3.</p>                                                                                                                          | N           | NA / Y / PY / PN / N / NI     |
| <p>1.3. Were intervention discontinuations or switches likely to be related to factors that are prognostic for the outcome?</p> <p><b>If N/PN</b>, answer questions relating to baseline confounding (1.4 to 1.6)</p> <p><b>If Y/PY</b>, answer questions relating to both baseline and time-varying confounding (1.7 and 1.8)</p>                                         |             | NA / Y / PY / PN / N / NI     |

|                                                                                                                                                       |     |                                                                       |
|-------------------------------------------------------------------------------------------------------------------------------------------------------|-----|-----------------------------------------------------------------------|
| <b>Questions relating to baseline confounding only</b>                                                                                                |     |                                                                       |
| 1.4. Did the authors use an appropriate analysis method that controlled for all the important confounding domains?                                    | Y   | NA / <u>Y</u> / <u>PY</u> / <u>PN</u><br>/ N / NI                     |
| 1.5. If <u>Y/PY</u> to 1.4: Were confounding domains that were controlled for measured validly and reliably by the variables available in this study? | Y   | NA / <u>Y</u> / <u>PY</u> / <u>PN</u><br>/ N / NI                     |
| 1.6. Did the authors control for any post-intervention variables that could have been affected by the intervention?                                   | N   | NA / Y / PY / <u>PN</u><br><u>N</u> / NI                              |
| <b>Questions relating to baseline and time-varying confounding</b>                                                                                    |     |                                                                       |
| 1.7. Did the authors use an appropriate analysis method that controlled for all the important confounding domains and for time-varying confounding?   | PY  | NA / <u>Y</u> / <u>PY</u> / <u>PN</u><br>/ N / NI                     |
| 1.8. If <u>Y/PY</u> to 1.7: Were confounding domains that were controlled for measured validly and reliably by the variables available in this study? | Y   | NA / <u>Y</u> / <u>PY</u> / <u>PN</u><br>/ N / NI                     |
| <b>Risk of bias judgement</b>                                                                                                                         | Low | Low / Moderate<br>/ Serious /<br>Critical / NI                        |
| Optional: What is the predicted direction of bias due to confounding?                                                                                 |     | Favours<br>experimental /<br>Favours<br>comparator /<br>Unpredictable |



**Bias in selection of participants into the study**

|                                                                                                                                                                                                                                                                                                                                                                                                                                                                                                                        |            |                                                                                                                                         |
|------------------------------------------------------------------------------------------------------------------------------------------------------------------------------------------------------------------------------------------------------------------------------------------------------------------------------------------------------------------------------------------------------------------------------------------------------------------------------------------------------------------------|------------|-----------------------------------------------------------------------------------------------------------------------------------------|
| <p>2.1. Was selection of participants into the study (or into the analysis) based on participant characteristics observed after the start of intervention?</p> <p><b>If N/PN to 2.1:</b> go to 2.4</p> <p>2.2. <b>If Y/PY to 2.1:</b> Were the post-intervention variables that influenced selection likely to be associated with intervention?</p> <p>2.3 <b>If Y/PY to 2.2:</b> Were the post-intervention variables that influenced selection likely to be influenced by the outcome or a cause of the outcome?</p> | <p>N</p>   | <p>Y / PY / <u>PN</u> / <u>N</u> / NI</p> <p>NA / Y / PY / <u>PN</u> / <u>N</u> / NI</p> <p>NA / Y / PY / <u>PN</u> / <u>N</u> / NI</p> |
| <p>2.4. Do start of follow-up and start of intervention coincide for most participants?</p>                                                                                                                                                                                                                                                                                                                                                                                                                            | <p>Y</p>   | <p><u>Y</u> / PY / PN / N / NI</p>                                                                                                      |
| <p>2.5. <b>If Y/PY to 2.2 and 2.3, or N/PN to 2.4:</b> Were adjustment techniques used that are likely to correct for the presence of selection biases?</p>                                                                                                                                                                                                                                                                                                                                                            |            | <p>NA / <u>Y</u> / PY / PN / N / NI</p>                                                                                                 |
| <p><b>Risk of bias judgement</b></p>                                                                                                                                                                                                                                                                                                                                                                                                                                                                                   | <p>Low</p> | <p>Low / Moderate / Serious / Critical / NI</p>                                                                                         |
| <p>Optional: What is the predicted direction of bias due to selection of participants into the study?</p>                                                                                                                                                                                                                                                                                                                                                                                                              |            | <p>Favours experimental / Favours comparator / Towards null / Away from null / Unpredictable</p>                                        |

**Bias in classification of interventions**

|                                                                                                                        |     |                                                                                           |
|------------------------------------------------------------------------------------------------------------------------|-----|-------------------------------------------------------------------------------------------|
| 3.1 Were intervention groups clearly defined?                                                                          | Y   | Y / PY / PN / N / NI                                                                      |
| 3.2 Was the information used to define intervention groups recorded at the start of the intervention?                  | Y   | Y / PY / PN / N / NI                                                                      |
| 3.3 Could classification of intervention status have been affected by knowledge of the outcome or risk of the outcome? | Pn  | Y / PY / PN / N / NI                                                                      |
| <b>Risk of bias judgement</b>                                                                                          | Low | Low / Moderate / Serious / Critical / NI                                                  |
| Optional: What is the predicted direction of bias due to classification of interventions?                              |     | Favours experimental / Favours comparator / Towards null / Away from null / Unpredictable |

**Bias due to deviations from intended interventions**

|                                                                                                                                                 |  |                                                |
|-------------------------------------------------------------------------------------------------------------------------------------------------|--|------------------------------------------------|
| <b>If your aim for this study is to assess the effect of assignment to intervention, answer questions 4.1 and 4.2</b>                           |  |                                                |
| 4.1. Were there deviations from the intended intervention beyond what would be expected in usual practice?                                      |  | Y / PY / <u>PN</u> / <u>N</u> / NI             |
| 4.2. <b>If Y/PY to 4.1:</b> Were these deviations from intended intervention unbalanced between groups and likely to have affected the outcome? |  | NA / Y / PY / <u>PN</u> / <u>N</u> / NI        |
| <b>If your aim for this study is to assess the effect of starting and adhering to intervention, answer questions 4.3 to 4.6</b>                 |  |                                                |
| 4.3. Were important co-interventions balanced across intervention groups?                                                                       |  | <u>Y</u> / PY / <u>PN</u> / <u>N</u> / NI      |
| 4.4. Was the intervention implemented successfully for most participants?                                                                       |  | <u>Y</u> / PY / <u>PN</u> / <u>N</u> / NI      |
| 4.5. Did study participants adhere to the assigned intervention regimen?                                                                        |  | <u>Y</u> / PY / <u>PN</u> / <u>N</u> / NI      |
| 4.6. <b>If N/PN to 4.3, 4.4 or 4.5:</b> Was an appropriate analysis used to estimate the effect of starting and adhering to the intervention?   |  | NA / <u>Y</u> / PY / <u>PN</u> / <u>N</u> / NI |
| <b>Risk of bias judgement</b>                                                                                                                   |  | Low / Moderate / Serious / Critical / NI       |

|                                                                                                      |  |                                                                                           |
|------------------------------------------------------------------------------------------------------|--|-------------------------------------------------------------------------------------------|
| Optional: What is the predicted direction of bias due to deviations from the intended interventions? |  | Favours experimental / Favours comparator / Towards null / Away from null / Unpredictable |
|------------------------------------------------------------------------------------------------------|--|-------------------------------------------------------------------------------------------|

**Bias due to missing data**

|                                                                                                                                                 |     |                                                                                           |
|-------------------------------------------------------------------------------------------------------------------------------------------------|-----|-------------------------------------------------------------------------------------------|
| 5.1 Were outcome data available for all, or nearly all, participants?                                                                           | Y   | <u>Y / PY</u> / <u>PN / N</u> / NI                                                        |
| 5.2 Were participants excluded due to missing data on intervention status?                                                                      | N   | Y / PY / <u>PN / N</u> / NI                                                               |
| 5.3 Were participants excluded due to missing data on other variables needed for the analysis?                                                  | Pn  | Y / PY / <u>PN / N</u> / NI                                                               |
| 5.4 <b>If PN/N to 5.1, or Y/PY to 5.2 or 5.3:</b> Are the proportion of participants and reasons for missing data similar across interventions? |     | NA / <u>Y / PY</u> / <u>PN</u> / N / NI                                                   |
| 5.5 <b>If PN/N to 5.1, or Y/PY to 5.2 or 5.3:</b> Is there evidence that results were robust to the presence of missing data?                   |     | NA / <u>Y / PY</u> / <u>PN</u> / N / NI                                                   |
| <b>Risk of bias judgement</b>                                                                                                                   | Low | Low / Moderate / Serious / Critical / NI                                                  |
| Optional: What is the predicted direction of bias due to missing data?                                                                          |     | Favours experimental / Favours comparator / Towards null / Away from null / Unpredictable |

**Bias in measurement of outcomes**

|                                                                                                |     |                                                                                           |
|------------------------------------------------------------------------------------------------|-----|-------------------------------------------------------------------------------------------|
| 6.1 Could the outcome measure have been influenced by knowledge of the intervention received?  | N   | Y / PY / <u>PN / N</u> / NI                                                               |
| 6.2 Were outcome assessors aware of the intervention received by study participants?           | Py  | Y / PY / <u>PN / N</u> / NI                                                               |
| 6.3 Were the methods of outcome assessment comparable across intervention groups?              | Y   | <u>Y / PY</u> / PN / N / NI                                                               |
| 6.4 Were any systematic errors in measurement of the outcome related to intervention received? | N   | Y / PY / <u>PN / N</u> / NI                                                               |
| <b>Risk of bias judgement</b>                                                                  | Low | Low / Moderate / Serious / Critical / NI                                                  |
| Optional: What is the predicted direction of bias due to measurement of outcomes?              |     | Favours experimental / Favours comparator / Towards null / Away from null / Unpredictable |

**Bias in selection of the reported result**

|                                                                                             |          |                                                                                           |
|---------------------------------------------------------------------------------------------|----------|-------------------------------------------------------------------------------------------|
| Is the reported effect estimate likely to be selected, on the basis of the results, from... |          |                                                                                           |
| 7.1. ... multiple outcome <i>measurements</i> within the outcome domain?                    | N        | Y / PY / <u>PN</u> / N / NI                                                               |
| 7.2 ... multiple <i>analyses</i> of the intervention-outcome relationship?                  | Pn       | Y / PY / <u>PN</u> / N / NI                                                               |
| 7.3 ... different <i>subgroups</i> ?                                                        | Py       | Y / PY / <u>PN</u> / N / NI                                                               |
| <b>Risk of bias judgement</b>                                                               | Moderate | Low / Moderate / Serious / Critical / NI                                                  |
| Optional: What is the predicted direction of bias due to selection of the reported result?  |          | Favours experimental / Favours comparator / Towards null / Away from null / Unpredictable |

**Overall bias**

|                                                                             |     |                                                                                           |
|-----------------------------------------------------------------------------|-----|-------------------------------------------------------------------------------------------|
| <b>Risk of bias judgement</b>                                               | Low | Low / Moderate / Serious / Critical / NI                                                  |
| Optional: What is the overall predicted direction of bias for this outcome? |     | Favours experimental / Favours comparator / Towards null / Away from null / Unpredictable |



## Mansur, 2015b

Primary bacteraemia is associated with a higher mortality risk compared with pulmonary and intra-abdominal infections in patients with sepsis: a prospective observational cohort study.

Responses underlined in green are potential markers for low risk of bias, and responses in **red** are potential markers for a risk of bias. Where questions relate only to sign posts to other questions, no formatting is used.

| Signalling questions                                                                                                                                                                                                                                                                                                                                                       | Description | Response options              |
|----------------------------------------------------------------------------------------------------------------------------------------------------------------------------------------------------------------------------------------------------------------------------------------------------------------------------------------------------------------------------|-------------|-------------------------------|
| <b>Bias due to confounding</b>                                                                                                                                                                                                                                                                                                                                             |             |                               |
| <p>1.1 Is there potential for confounding of the effect of intervention in this study?</p> <p><b>If <u>N/PN</u> to 1.1:</b> the study can be considered to be at low risk of bias due to confounding and no further signalling questions need be considered</p> <p><b>If <b>Y/PY</b> to 1.1:</b> determine whether there is a need to assess time-varying confounding:</p> | Y           | <b>Y / PY</b> / <u>PN / N</u> |
| <p>1.2. Was the analysis based on splitting participants' follow up time according to intervention received?</p> <p><b>If N/PN</b>, answer questions relating to baseline confounding (1.4 to 1.6)</p> <p><b>If Y/PY</b>, go to question 1.3.</p>                                                                                                                          | N           | NA / Y / PY / PN / N / NI     |
| <p>1.3. Were intervention discontinuations or switches likely to be related to factors that are prognostic for the outcome?</p> <p><b>If N/PN</b>, answer questions relating to baseline confounding (1.4 to 1.6)</p> <p><b>If Y/PY</b>, answer questions relating to both baseline and time-varying confounding (1.7 and 1.8)</p>                                         |             | NA / Y / PY / PN / N / NI     |

|                                                                                                                                                       |          |                                                                       |
|-------------------------------------------------------------------------------------------------------------------------------------------------------|----------|-----------------------------------------------------------------------|
| <b>Questions relating to baseline confounding only</b>                                                                                                |          |                                                                       |
| 1.4. Did the authors use an appropriate analysis method that controlled for all the important confounding domains?                                    | Y        | NA / <u>Y</u> / <u>PY</u> / <u>PN</u><br>/ <u>N</u> / NI              |
| 1.5. If <u>Y/PY</u> to 1.4: Were confounding domains that were controlled for measured validly and reliably by the variables available in this study? | Y        | NA / <u>Y</u> / <u>PY</u> / <u>PN</u><br>/ <u>N</u> / NI              |
| 1.6. Did the authors control for any post-intervention variables that could have been affected by the intervention?                                   | N        | NA / <u>Y</u> / <u>PY</u> / <u>PN</u><br><u>/N</u> / NI               |
| <b>Questions relating to baseline and time-varying confounding</b>                                                                                    |          |                                                                       |
| 1.7. Did the authors use an appropriate analysis method that controlled for all the important confounding domains and for time-varying confounding?   | PN       | NA / <u>Y</u> / <u>PY</u> / <u>PN</u><br>/ <u>N</u> / NI              |
| 1.8. If <u>Y/PY</u> to 1.7: Were confounding domains that were controlled for measured validly and reliably by the variables available in this study? |          | NA / <u>Y</u> / <u>PY</u> / <u>PN</u><br>/ <u>N</u> / NI              |
| <b>Risk of bias judgement</b>                                                                                                                         | Moderate | Low / Moderate<br>/ Serious /<br>Critical / NI                        |
| Optional: What is the predicted direction of bias due to confounding?                                                                                 |          | Favours<br>experimental /<br>Favours<br>comparator /<br>Unpredictable |

**Bias in selection of participants into the study**

|                                                                                                                                                                                                                                                                                                                                                                                                                                                                                                                        |            |                                                                                                                                         |
|------------------------------------------------------------------------------------------------------------------------------------------------------------------------------------------------------------------------------------------------------------------------------------------------------------------------------------------------------------------------------------------------------------------------------------------------------------------------------------------------------------------------|------------|-----------------------------------------------------------------------------------------------------------------------------------------|
| <p>2.1. Was selection of participants into the study (or into the analysis) based on participant characteristics observed after the start of intervention?</p> <p><b>If N/PN to 2.1:</b> go to 2.4</p> <p>2.2. <b>If Y/PY to 2.1:</b> Were the post-intervention variables that influenced selection likely to be associated with intervention?</p> <p>2.3 <b>If Y/PY to 2.2:</b> Were the post-intervention variables that influenced selection likely to be influenced by the outcome or a cause of the outcome?</p> | <p>N</p>   | <p>Y / PY / <u>PN</u> / <u>N</u> / NI</p> <p>NA / Y / PY / <u>PN</u> / <u>N</u> / NI</p> <p>NA / Y / PY / <u>PN</u> / <u>N</u> / NI</p> |
| <p>2.4. Do start of follow-up and start of intervention coincide for most participants?</p>                                                                                                                                                                                                                                                                                                                                                                                                                            | <p>Y</p>   | <p><u>Y</u> / PY / PN / N / NI</p>                                                                                                      |
| <p>2.5. <b>If Y/PY to 2.2 and 2.3, or N/PN to 2.4:</b> Were adjustment techniques used that are likely to correct for the presence of selection biases?</p>                                                                                                                                                                                                                                                                                                                                                            |            | <p>NA / <u>Y</u> / PY / PN / N / NI</p>                                                                                                 |
| <p><b>Risk of bias judgement</b></p>                                                                                                                                                                                                                                                                                                                                                                                                                                                                                   | <p>Low</p> | <p>Low / Moderate / Serious / Critical / NI</p>                                                                                         |
| <p>Optional: What is the predicted direction of bias due to selection of participants into the study?</p>                                                                                                                                                                                                                                                                                                                                                                                                              |            | <p>Favours experimental / Favours comparator / Towards null / Away from null / Unpredictable</p>                                        |

**Bias in classification of interventions**

|                                                                                                                        |     |                                                                                           |
|------------------------------------------------------------------------------------------------------------------------|-----|-------------------------------------------------------------------------------------------|
| 3.1 Were intervention groups clearly defined?                                                                          | Y   | Y / PY / PN / N / NI                                                                      |
| 3.2 Was the information used to define intervention groups recorded at the start of the intervention?                  | Y   | Y / PY / PN / N / NI                                                                      |
| 3.3 Could classification of intervention status have been affected by knowledge of the outcome or risk of the outcome? | N   | Y / PY / PN / N / NI                                                                      |
| <b>Risk of bias judgement</b>                                                                                          | Low | Low / Moderate / Serious / Critical / NI                                                  |
| Optional: What is the predicted direction of bias due to classification of interventions?                              |     | Favours experimental / Favours comparator / Towards null / Away from null / Unpredictable |

**Bias due to deviations from intended interventions**

|                                                                                                                                                 |  |                                                |
|-------------------------------------------------------------------------------------------------------------------------------------------------|--|------------------------------------------------|
| <b>If your aim for this study is to assess the effect of assignment to intervention, answer questions 4.1 and 4.2</b>                           |  |                                                |
| 4.1. Were there deviations from the intended intervention beyond what would be expected in usual practice?                                      |  | Y / PY / <u>PN</u> / <u>N</u> / NI             |
| 4.2. <b>If Y/PY to 4.1:</b> Were these deviations from intended intervention unbalanced between groups and likely to have affected the outcome? |  | NA / Y / PY / <u>PN</u> / <u>N</u> / NI        |
| <b>If your aim for this study is to assess the effect of starting and adhering to intervention, answer questions 4.3 to 4.6</b>                 |  |                                                |
| 4.3. Were important co-interventions balanced across intervention groups?                                                                       |  | <u>Y</u> / PY / <u>PN</u> / <u>N</u> / NI      |
| 4.4. Was the intervention implemented successfully for most participants?                                                                       |  | <u>Y</u> / PY / <u>PN</u> / <u>N</u> / NI      |
| 4.5. Did study participants adhere to the assigned intervention regimen?                                                                        |  | <u>Y</u> / PY / <u>PN</u> / <u>N</u> / NI      |
| 4.6. <b>If N/PN to 4.3, 4.4 or 4.5:</b> Was an appropriate analysis used to estimate the effect of starting and adhering to the intervention?   |  | NA / <u>Y</u> / PY / <u>PN</u> / <u>N</u> / NI |
| <b>Risk of bias judgement</b>                                                                                                                   |  | Low / Moderate / Serious / Critical / NI       |

|                                                                                                      |  |                                                                                                      |
|------------------------------------------------------------------------------------------------------|--|------------------------------------------------------------------------------------------------------|
| Optional: What is the predicted direction of bias due to deviations from the intended interventions? |  | Favours experimental /<br>Favours comparator /<br>Towards null<br>/Away from null<br>/ Unpredictable |
|------------------------------------------------------------------------------------------------------|--|------------------------------------------------------------------------------------------------------|

**Bias due to missing data**

|                                                                                                                                                 |     |                                                                                           |
|-------------------------------------------------------------------------------------------------------------------------------------------------|-----|-------------------------------------------------------------------------------------------|
| 5.1 Were outcome data available for all, or nearly all, participants?                                                                           | Y   | <u>Y / PY</u> / PN / N / NI                                                               |
| 5.2 Were participants excluded due to missing data on intervention status?                                                                      | N   | Y / PY / <u>PN / N</u> / NI                                                               |
| 5.3 Were participants excluded due to missing data on other variables needed for the analysis?                                                  | PN  | Y / PY / <u>PN / N</u> / NI                                                               |
| 5.4 <b>If PN/N to 5.1, or Y/PY to 5.2 or 5.3:</b> Are the proportion of participants and reasons for missing data similar across interventions? |     | NA / <u>Y / PY</u> / PN / N / NI                                                          |
| 5.5 <b>If PN/N to 5.1, or Y/PY to 5.2 or 5.3:</b> Is there evidence that results were robust to the presence of missing data?                   |     | NA / <u>Y / PY</u> / PN / N / NI                                                          |
| <b>Risk of bias judgement</b>                                                                                                                   | Low | Low / Moderate / Serious / Critical / NI                                                  |
| Optional: What is the predicted direction of bias due to missing data?                                                                          |     | Favours experimental / Favours comparator / Towards null / Away from null / Unpredictable |

**Bias in measurement of outcomes**

|                                                                                                |                 |                                                                                           |
|------------------------------------------------------------------------------------------------|-----------------|-------------------------------------------------------------------------------------------|
| 6.1 Could the outcome measure have been influenced by knowledge of the intervention received?  | N               | Y / PY / <u>PN / N</u> / NI                                                               |
| 6.2 Were outcome assessors aware of the intervention received by study participants?           | PY              | Y / PY / <u>PN / N</u> / NI                                                               |
| 6.3 Were the methods of outcome assessment comparable across intervention groups?              | Y               | <u>Y / PY</u> / PN / N / NI                                                               |
| 6.4 Were any systematic errors in measurement of the outcome related to intervention received? | N               | Y / PY / <u>PN / N</u> / NI                                                               |
| <b>Risk of bias judgement</b>                                                                  | Low to moderate | Low / Moderate / Serious / Critical / NI                                                  |
| Optional: What is the predicted direction of bias due to measurement of outcomes?              |                 | Favours experimental / Favours comparator / Towards null / Away from null / Unpredictable |



**Bias in selection of the reported result**

|                                                                                             |                     |                                                                                           |
|---------------------------------------------------------------------------------------------|---------------------|-------------------------------------------------------------------------------------------|
| Is the reported effect estimate likely to be selected, on the basis of the results, from... |                     |                                                                                           |
| 7.1. ... multiple outcome <i>measurements</i> within the outcome domain?                    | n                   | Y / PY / <u>PN</u> / <u>N</u> / NI                                                        |
| 7.2 ... multiple <i>analyses</i> of the intervention-outcome relationship?                  | PN                  | Y / PY / <u>PN</u> / <u>N</u> / NI                                                        |
| 7.3 ... different <i>subgroups</i> ?                                                        | PY                  | Y / PY / <u>PN</u> / <u>N</u> / NI                                                        |
| <b>Risk of bias judgement</b>                                                               | Moderate to Serious | Low / Moderate / Serious / Critical / NI                                                  |
| Optional: What is the predicted direction of bias due to selection of the reported result?  |                     | Favours experimental / Favours comparator / Towards null / Away from null / Unpredictable |

**Overall bias**

|                                                                             |          |                                                                                                            |
|-----------------------------------------------------------------------------|----------|------------------------------------------------------------------------------------------------------------|
| <b>Risk of bias judgement</b>                                               | Moderate | Low / Moderate<br>/ Serious /<br>Critical / NI                                                             |
| Optional: What is the overall predicted direction of bias for this outcome? |          | Favours<br>experimental /<br>Favours<br>comparator /<br>Towards null<br>/Away from null<br>/ Unpredictable |

**Study details**

**Reference**

Schädler D, Pausch C, Heise D, et al. The effect of a novel extracorporeal cytokine hemoadsorption device on IL-6 elimination in septic patients: A randomized controlled trial. PLoS One. 2017;12(10):e0187015. Published 2017 Oct 30.

**Study design**

- Individually-randomized parallel-group trial
- Cluster-randomized parallel-group trial
- Individually randomized cross-over (or other matched) trial

**For the purposes of this assessment, the interventions being compared are defined as**

Experimental: 6-hour CytoSorb hemoperfusion      Comparator: No hemoperfusion

**Specify which outcome is being assessed for risk of bias**

90-day mortality (septic shock patients)

**Specify the numerical result being assessed.** In case of multiple alternative analyses being presented, specify the numeric result (e.g. RR = 1.52 (95% CI 0.83 to 2.77) and/or a reference (e.g. to a table, figure or paragraph) that uniquely defines the result being assessed.

**Is the review team's aim for this result...?**

- to assess the effect of *assignment to intervention* (the 'intention-to-treat' effect)
- to assess the effect of *adhering to intervention* (the 'per-protocol' effect)

**If the aim is to assess the effect of adhering to intervention**, select the deviations from intended intervention that should be addressed (at least one must be checked):

- occurrence of non-protocol interventions
- failures in implementing the intervention that could have affected the outcome
- non-adherence to their assigned intervention by trial participants

**Which of the following sources were obtained to help inform the risk-of-bias assessment? (tick as many as apply)**

- Journal article(s) with results of the trial
- X Trial protocol
- Statistical analysis plan (SAP)
- X Non-commercial trial registry record (e.g. ClinicalTrials.gov record)
- Company-owned trial registry record (e.g. GSK Clinical Study Register record)
- "Grey literature" (e.g. unpublished thesis)
- Conference abstract(s) about the trial
- Regulatory document (e.g. Clinical Study Report, Drug Approval Package)
- Research ethics application
- Grant database summary (e.g. NIH RePORTER or Research Councils UK Gateway to Research)
- Personal communication with trialist
- Personal communication with the sponsor

Risk of bias assessment

Responses underlined in green are potential markers for low risk of bias, and responses in **red** are potential markers for a risk of bias. Where questions relate only to sign posts to other questions, no formatting is used.

### Domain 1: Risk of bias arising from the randomization process

| Signalling questions                                                                                       | Comments                              | Response options                                                                               |
|------------------------------------------------------------------------------------------------------------|---------------------------------------|------------------------------------------------------------------------------------------------|
| 1.1 Was the allocation sequence random?                                                                    | PN                                    | <u>Y / PY</u> / PN / N / NI                                                                    |
| 1.2 Was the allocation sequence concealed until participants were enrolled and assigned to interventions?  | PN<br>(Not concealed for 32 patients) | <u>Y / PY</u> / PN / N / NI                                                                    |
| 1.3 Did baseline differences between intervention groups suggest a problem with the randomization process? | PY                                    | Y / PY / <u>PN / N</u> / NI                                                                    |
| Risk-of-bias judgement                                                                                     | High                                  | Low / High / Some concerns                                                                     |
| Optional: What is the predicted direction of bias arising from the randomization process?                  |                                       | NA / Favours experimental / Favours comparator / Towards null / Away from null / Unpredictable |

Domain 2: Risk of bias due to deviations from the intended interventions (*effect of assignment to intervention*)

| Signalling questions                                                                                                                                                           | Comments | Response options                 |
|--------------------------------------------------------------------------------------------------------------------------------------------------------------------------------|----------|----------------------------------|
| 2.1. Were participants aware of their assigned intervention during the trial?                                                                                                  | Y        | Y / PY / <u>PN / N</u> / NI      |
| 2.2. Were carers and people delivering the interventions aware of participants' assigned intervention during the trial?                                                        | Y        | Y / PY / <u>PN / N</u> / NI      |
| 2.3. If <u>Y/PY/NI</u> to 2.1 or 2.2: Were there deviations from the intended intervention that arose because of the trial context?                                            | PN       | NA / Y / PY / <u>PN / N</u> / NI |
| 2.4. If <u>Y/PY</u> to 2.3: Were these deviations likely to have affected the outcome?                                                                                         |          | NA / Y / PY / <u>PN / N</u> / NI |
| 2.5. If <u>Y/PY/NI</u> to 2.4: Were these deviations from intended intervention balanced between groups?                                                                       |          | NA / <u>Y / PY</u> / PN / N / NI |
| 2.6. Was an appropriate analysis used to estimate the effect of assignment to intervention?                                                                                    | Y        | <u>Y / PY</u> / PN / N / NI      |
| 2.7. If <u>N/PN/NI</u> to 2.6: Was there potential for a substantial impact (on the result) of the failure to analyse participants in the group to which they were randomized? |          | NA / Y / PY / <u>PN / N</u> / NI |
| Risk-of-bias judgement                                                                                                                                                         | Low      | Low / High / Some concerns       |

|                                                                                                  |  |                                                                                                |
|--------------------------------------------------------------------------------------------------|--|------------------------------------------------------------------------------------------------|
| Optional: What is the predicted direction of bias due to deviations from intended interventions? |  | NA / Favours experimental / Favours comparator / Towards null / Away from null / Unpredictable |
|--------------------------------------------------------------------------------------------------|--|------------------------------------------------------------------------------------------------|

Domain 3: Missing outcome data

| Signalling questions                                                                                    | Comments | Response options                                                                               |
|---------------------------------------------------------------------------------------------------------|----------|------------------------------------------------------------------------------------------------|
| 3.1 Were data for this outcome available for all, or nearly all, participants randomized?               | Py       | <u>Y</u> / PY / PN / N / NI                                                                    |
| 3.2 If <u>N/PN/NI</u> to 3.1: Is there evidence that the result was not biased by missing outcome data? |          | NA / <u>Y</u> / PY / PN / N                                                                    |
| 3.3 If <u>N/PN</u> to 3.2: Could missingness in the outcome depend on its true value?                   |          | NA / Y / PY / <u>PN</u> / N / NI                                                               |
| 3.4 If <u>Y/PY/NI</u> to 3.3: Is it likely that missingness in the outcome depended on its true value?  |          | NA / Y / PY / <u>PN</u> / N / NI                                                               |
| Risk-of-bias judgement                                                                                  | Low      | Low / High / Some concerns                                                                     |
| Optional: What is the predicted direction of bias due to missing outcome data?                          |          | NA / Favours experimental / Favours comparator / Towards null / Away from null / Unpredictable |



Domain 4: Risk of bias in measurement of the outcome

| Signalling questions                                                                                                            | Comments | Response options                                                                               |
|---------------------------------------------------------------------------------------------------------------------------------|----------|------------------------------------------------------------------------------------------------|
| 4.1 Was the method of measuring the outcome inappropriate?                                                                      | N        | Y / PY / <u>PN / N</u> / NI                                                                    |
| 4.2 Could measurement or ascertainment of the outcome have differed between intervention groups?                                | N        | Y / PY / <u>PN / N</u> / NI                                                                    |
| 4.3 If <u>N/PN/NI</u> to 4.1 and 4.2: Were outcome assessors aware of the intervention received by study participants?          | PY       | NA / Y / PY / <u>PN / N</u> / NI                                                               |
| 4.4 If <u>Y/PY/NI</u> to 4.3: Could assessment of the outcome have been influenced by knowledge of intervention received?       | N        | NA / Y / PY / <u>PN / N</u> / NI                                                               |
| 4.5 If <u>Y/PY/NI</u> to 4.4: Is it likely that assessment of the outcome was influenced by knowledge of intervention received? |          | NA / Y / PY / <u>PN / N</u> / NI                                                               |
| <b>Risk-of-bias judgement</b>                                                                                                   | low      | Low / High / Some concerns                                                                     |
| Optional: What is the predicted direction of bias in measurement of the outcome?                                                |          | NA / Favours experimental / Favours comparator / Towards null / Away from null / Unpredictable |

Domain 5: Risk of bias in selection of the reported result

| Signalling questions                                                                                                                                                                | Comments | Response options                                                                               |
|-------------------------------------------------------------------------------------------------------------------------------------------------------------------------------------|----------|------------------------------------------------------------------------------------------------|
| 5.1 Were the data that produced this result analysed in accordance with a pre-specified analysis plan that was finalized before unblinded outcome data were available for analysis? | NI       | Y / PY / PN / N / NI                                                                           |
| Is the numerical result being assessed likely to have been selected, on the basis of the results, from...                                                                           |          |                                                                                                |
| 5.2. ... multiple eligible outcome measurements (e.g. scales, definitions, time points) within the outcome domain?                                                                  | N        | Y / PY / PN / N / NI                                                                           |
| 5.3 ... multiple eligible analyses of the data?                                                                                                                                     | PY       | Y / PY / PN / N / NI                                                                           |
| <b>Risk-of-bias judgement</b>                                                                                                                                                       | High     | Low / High / Some concerns                                                                     |
| Optional: What is the predicted direction of bias due to selection of the reported result?                                                                                          |          | NA / Favours experimental / Favours comparator / Towards null / Away from null / Unpredictable |

Overall risk of bias

|                                                                             |              |                                                                                                |
|-----------------------------------------------------------------------------|--------------|------------------------------------------------------------------------------------------------|
| <b>Risk-of-bias judgement</b>                                               | Some concern | Low / High / Some concerns                                                                     |
| Optional: What is the overall predicted direction of bias for this outcome? |              | NA / Favours experimental / Favours comparator / Towards null / Away from null / Unpredictable |

## Scheer, 2017

Responses underlined in green are potential markers for low risk of bias, and responses in **red** are potential markers for a risk of bias. Where questions relate only to sign posts to other questions, no formatting is used.

| Signalling questions                                                                                                                                                                                                                                                                                                                                                       | Description | Response options              |
|----------------------------------------------------------------------------------------------------------------------------------------------------------------------------------------------------------------------------------------------------------------------------------------------------------------------------------------------------------------------------|-------------|-------------------------------|
| <b>Bias due to confounding</b>                                                                                                                                                                                                                                                                                                                                             |             |                               |
| <p>1.1 Is there potential for confounding of the effect of intervention in this study?</p> <p><b>If <u>N/PN</u> to 1.1:</b> the study can be considered to be at low risk of bias due to confounding and no further signalling questions need be considered</p> <p><b>If <b>Y/PY</b> to 1.1:</b> determine whether there is a need to assess time-varying confounding:</p> | Y           | <b>Y / PY</b> / <u>PN / N</u> |
| <p>1.2. Was the analysis based on splitting participants' follow up time according to intervention received?</p> <p><b>If <b>N/PN</b>,</b> answer questions relating to baseline confounding (1.4 to 1.6)</p> <p><b>If <b>Y/PY</b>,</b> go to question 1.3.</p>                                                                                                            | N           | NA / Y / PY / PN / N / NI     |
| <p>1.3. Were intervention discontinuations or switches likely to be related to factors that are prognostic for the outcome?</p> <p><b>If <b>N/PN</b>,</b> answer questions relating to baseline confounding (1.4 to 1.6)</p> <p><b>If <b>Y/PY</b>,</b> answer questions relating to both baseline and time-varying confounding (1.7 and 1.8)</p>                           |             | NA / Y / PY / PN / N / NI     |

|                                                                                                                                                              |          |                                                                       |
|--------------------------------------------------------------------------------------------------------------------------------------------------------------|----------|-----------------------------------------------------------------------|
| <b>Questions relating to baseline confounding only</b>                                                                                                       |          |                                                                       |
| 1.4. Did the authors use an appropriate analysis method that controlled for all the important confounding domains?                                           | PY       | NA / <u>Y</u> / <u>PY</u> / <u>PN</u><br>/ N / NI                     |
| 1.5. <b>If <u>Y/PY</u> to 1.4:</b> Were confounding domains that were controlled for measured validly and reliably by the variables available in this study? | Y        | NA / <u>Y</u> / <u>PY</u> / <u>PN</u><br>/ N / NI                     |
| 1.6. Did the authors control for any post-intervention variables that could have been affected by the intervention?                                          | N        | NA / <u>Y</u> / <u>PY</u> / <u>PN</u><br><u>/N</u> / NI               |
| <b>Questions relating to baseline and time-varying confounding</b>                                                                                           |          |                                                                       |
| 1.7. Did the authors use an appropriate analysis method that controlled for all the important confounding domains and for time-varying confounding?          | NI       | NA / <u>Y</u> / <u>PY</u> / <u>PN</u><br>/ N / NI                     |
| 1.8. <b>If <u>Y/PY</u> to 1.7:</b> Were confounding domains that were controlled for measured validly and reliably by the variables available in this study? |          | NA / <u>Y</u> / <u>PY</u> / <u>PN</u><br>/ N / NI                     |
| <b>Risk of bias judgement</b>                                                                                                                                | Moderate | Low / Moderate<br>/ Serious /<br>Critical / NI                        |
| Optional: What is the predicted direction of bias due to confounding?                                                                                        |          | Favours<br>experimental /<br>Favours<br>comparator /<br>Unpredictable |

**Bias in selection of participants into the study**

|                                                                                                                                                                                                                                                                                                                                                                                                                                                                                                                        |            |                                                                                                                                         |
|------------------------------------------------------------------------------------------------------------------------------------------------------------------------------------------------------------------------------------------------------------------------------------------------------------------------------------------------------------------------------------------------------------------------------------------------------------------------------------------------------------------------|------------|-----------------------------------------------------------------------------------------------------------------------------------------|
| <p>2.1. Was selection of participants into the study (or into the analysis) based on participant characteristics observed after the start of intervention?</p> <p><b>If N/PN to 2.1:</b> go to 2.4</p> <p>2.2. <b>If Y/PY to 2.1:</b> Were the post-intervention variables that influenced selection likely to be associated with intervention?</p> <p>2.3 <b>If Y/PY to 2.2:</b> Were the post-intervention variables that influenced selection likely to be influenced by the outcome or a cause of the outcome?</p> | <p>N</p>   | <p>Y / PY / <u>PN</u> / <u>N</u> / NI</p> <p>NA / Y / PY / <u>PN</u> / <u>N</u> / NI</p> <p>NA / Y / PY / <u>PN</u> / <u>N</u> / NI</p> |
| <p>2.4. Do start of follow-up and start of intervention coincide for most participants?</p>                                                                                                                                                                                                                                                                                                                                                                                                                            | <p>Y</p>   | <p><u>Y</u> / PY / PN / N / NI</p>                                                                                                      |
| <p>2.5. <b>If Y/PY to 2.2 and 2.3, or N/PN to 2.4:</b> Were adjustment techniques used that are likely to correct for the presence of selection biases?</p>                                                                                                                                                                                                                                                                                                                                                            |            | <p>NA / <u>Y</u> / PY / PN / N / NI</p>                                                                                                 |
| <p><b>Risk of bias judgement</b></p>                                                                                                                                                                                                                                                                                                                                                                                                                                                                                   | <p>Low</p> | <p>Low / Moderate / Serious / Critical / NI</p>                                                                                         |
| <p>Optional: What is the predicted direction of bias due to selection of participants into the study?</p>                                                                                                                                                                                                                                                                                                                                                                                                              |            | <p>Favours experimental / Favours comparator / Towards null / Away from null / Unpredictable</p>                                        |

**Bias in classification of interventions**

|                                                                                                                        |     |                                                                                           |
|------------------------------------------------------------------------------------------------------------------------|-----|-------------------------------------------------------------------------------------------|
| 3.1 Were intervention groups clearly defined?                                                                          | Y   | Y / PY / PN / N / NI                                                                      |
| 3.2 Was the information used to define intervention groups recorded at the start of the intervention?                  | Y   | Y / PY / PN / N / NI                                                                      |
| 3.3 Could classification of intervention status have been affected by knowledge of the outcome or risk of the outcome? | N   | Y / PY / PN / N / NI                                                                      |
| <b>Risk of bias judgement</b>                                                                                          | Low | Low / Moderate / Serious / Critical / NI                                                  |
| Optional: What is the predicted direction of bias due to classification of interventions?                              |     | Favours experimental / Favours comparator / Towards null / Away from null / Unpredictable |

**Bias due to deviations from intended interventions**

|                                                                                                                                                 |  |                                                |
|-------------------------------------------------------------------------------------------------------------------------------------------------|--|------------------------------------------------|
| <b>If your aim for this study is to assess the effect of assignment to intervention, answer questions 4.1 and 4.2</b>                           |  |                                                |
| 4.1. Were there deviations from the intended intervention beyond what would be expected in usual practice?                                      |  | Y / PY / <u>PN</u> / <u>N</u> / NI             |
| 4.2. <b>If Y/PY to 4.1:</b> Were these deviations from intended intervention unbalanced between groups and likely to have affected the outcome? |  | NA / Y / PY / <u>PN</u> / <u>N</u> / NI        |
| <b>If your aim for this study is to assess the effect of starting and adhering to intervention, answer questions 4.3 to 4.6</b>                 |  |                                                |
| 4.3. Were important co-interventions balanced across intervention groups?                                                                       |  | <u>Y</u> / PY / <u>PN</u> / <u>N</u> / NI      |
| 4.4. Was the intervention implemented successfully for most participants?                                                                       |  | <u>Y</u> / PY / <u>PN</u> / <u>N</u> / NI      |
| 4.5. Did study participants adhere to the assigned intervention regimen?                                                                        |  | <u>Y</u> / PY / <u>PN</u> / <u>N</u> / NI      |
| 4.6. <b>If N/PN to 4.3, 4.4 or 4.5:</b> Was an appropriate analysis used to estimate the effect of starting and adhering to the intervention?   |  | NA / <u>Y</u> / PY / <u>PN</u> / <u>N</u> / NI |
| <b>Risk of bias judgement</b>                                                                                                                   |  | Low / Moderate / Serious / Critical / NI       |



|                                                                                                      |  |                                                                                                      |
|------------------------------------------------------------------------------------------------------|--|------------------------------------------------------------------------------------------------------|
| Optional: What is the predicted direction of bias due to deviations from the intended interventions? |  | Favours experimental /<br>Favours comparator /<br>Towards null<br>/Away from null<br>/ Unpredictable |
|------------------------------------------------------------------------------------------------------|--|------------------------------------------------------------------------------------------------------|

**Bias due to missing data**

|                                                                                                                                                 |          |                                                                                           |
|-------------------------------------------------------------------------------------------------------------------------------------------------|----------|-------------------------------------------------------------------------------------------|
| 5.1 Were outcome data available for all, or nearly all, participants?                                                                           | Y        | <u>Y / PY</u> / <u>PN / N</u> / NI                                                        |
| 5.2 Were participants excluded due to missing data on intervention status?                                                                      | N        | Y / PY / <u>PN / N</u> / NI                                                               |
| 5.3 Were participants excluded due to missing data on other variables needed for the analysis?                                                  | Y        | Y / PY / <u>PN / N</u> / NI                                                               |
| 5.4 <b>If PN/N to 5.1, or Y/PY to 5.2 or 5.3:</b> Are the proportion of participants and reasons for missing data similar across interventions? | PY       | NA / <u>Y / PY</u> / <u>PN</u> / N / NI                                                   |
| 5.5 <b>If PN/N to 5.1, or Y/PY to 5.2 or 5.3:</b> Is there evidence that results were robust to the presence of missing data?                   | NI       | NA / <u>Y / PY</u> / <u>PN</u> / N / NI                                                   |
| <b>Risk of bias judgement</b>                                                                                                                   | Moderate | Low / Moderate / Serious / Critical / NI                                                  |
| Optional: What is the predicted direction of bias due to missing data?                                                                          |          | Favours experimental / Favours comparator / Towards null / Away from null / Unpredictable |

**Bias in measurement of outcomes**

|                                                                                                |                 |                                                                                           |
|------------------------------------------------------------------------------------------------|-----------------|-------------------------------------------------------------------------------------------|
| 6.1 Could the outcome measure have been influenced by knowledge of the intervention received?  | N               | Y / PY / <u>PN / N</u> / NI                                                               |
| 6.2 Were outcome assessors aware of the intervention received by study participants?           | Y               | Y / PY / <u>PN / N</u> / NI                                                               |
| 6.3 Were the methods of outcome assessment comparable across intervention groups?              | Py              | <u>Y / PY</u> / <u>PN / N</u> / NI                                                        |
| 6.4 Were any systematic errors in measurement of the outcome related to intervention received? | N               | Y / PY / <u>PN / N</u> / NI                                                               |
| <b>Risk of bias judgement</b>                                                                  | Low to Moderate | Low / Moderate / Serious / Critical / NI                                                  |
| Optional: What is the predicted direction of bias due to measurement of outcomes?              |                 | Favours experimental / Favours comparator / Towards null / Away from null / Unpredictable |

**Bias in selection of the reported result**

|                                                                                             |          |                                                                                           |
|---------------------------------------------------------------------------------------------|----------|-------------------------------------------------------------------------------------------|
| Is the reported effect estimate likely to be selected, on the basis of the results, from... |          |                                                                                           |
| 7.1. ... multiple outcome <i>measurements</i> within the outcome domain?                    | N        | Y / PY / <u>PN</u> / N / NI                                                               |
| 7.2 ... multiple <i>analyses</i> of the intervention-outcome relationship?                  | Py       | Y / PY / <u>PN</u> / N / NI                                                               |
| 7.3 ... different <i>subgroups</i> ?                                                        | Pn       | Y / PY / <u>PN</u> / N / NI                                                               |
| <b>Risk of bias judgement</b>                                                               | Moderate | Low / Moderate / Serious / Critical / NI                                                  |
| Optional: What is the predicted direction of bias due to selection of the reported result?  |          | Favours experimental / Favours comparator / Towards null / Away from null / Unpredictable |

**Overall bias**

|                                                                             |          |                                                                                                            |
|-----------------------------------------------------------------------------|----------|------------------------------------------------------------------------------------------------------------|
| <b>Risk of bias judgement</b>                                               | Moderate | Low / Moderate<br>/ Serious /<br>Critical / NI                                                             |
| Optional: What is the overall predicted direction of bias for this outcome? |          | Favours<br>experimental /<br>Favours<br>comparator /<br>Towards null<br>/Away from null<br>/ Unpredictable |

## Simon, 2017

Responses underlined in green are potential markers for low risk of bias, and responses in **red** are potential markers for a risk of bias. Where questions relate only to sign posts to other questions, no formatting is used.

| Signalling questions                                                                                                                                                                                                                                                                                                                                                       | Description | Response options              |
|----------------------------------------------------------------------------------------------------------------------------------------------------------------------------------------------------------------------------------------------------------------------------------------------------------------------------------------------------------------------------|-------------|-------------------------------|
| <b>Bias due to confounding</b>                                                                                                                                                                                                                                                                                                                                             |             |                               |
| <p>1.1 Is there potential for confounding of the effect of intervention in this study?</p> <p><b>If <u>N/PN</u> to 1.1:</b> the study can be considered to be at low risk of bias due to confounding and no further signalling questions need be considered</p> <p><b>If <b>Y/PY</b> to 1.1:</b> determine whether there is a need to assess time-varying confounding:</p> | Y           | <b>Y / PY / <u>PN / N</u></b> |
| <p>1.2. Was the analysis based on splitting participants' follow up time according to intervention received?</p> <p><b>If <b>N/PN</b>,</b> answer questions relating to baseline confounding (1.4 to 1.6)</p> <p><b>If <b>Y/PY</b>,</b> go to question 1.3.</p>                                                                                                            | N           | NA / Y / PY / PN / N / NI     |
| <p>1.3. Were intervention discontinuations or switches likely to be related to factors that are prognostic for the outcome?</p> <p><b>If <b>N/PN</b>,</b> answer questions relating to baseline confounding (1.4 to 1.6)</p> <p><b>If <b>Y/PY</b>,</b> answer questions relating to both baseline and time-varying confounding (1.7 and 1.8)</p>                           |             | NA / Y / PY / PN / N / NI     |

|                                                                                                                                                              |         |                                                                       |
|--------------------------------------------------------------------------------------------------------------------------------------------------------------|---------|-----------------------------------------------------------------------|
| <b>Questions relating to baseline confounding only</b>                                                                                                       |         |                                                                       |
| 1.4. Did the authors use an appropriate analysis method that controlled for all the important confounding domains?                                           | Ni      | NA / <u>Y</u> / <u>PY</u> / <u>PN</u><br>/ N / NI                     |
| 1.5. <b>If <u>Y/PY</u> to 1.4:</b> Were confounding domains that were controlled for measured validly and reliably by the variables available in this study? |         | NA / <u>Y</u> / <u>PY</u> / <u>PN</u><br>/ N / NI                     |
| 1.6. Did the authors control for any post-intervention variables that could have been affected by the intervention?                                          | N       | NA / <u>Y</u> / <u>PY</u> / <u>PN</u><br><u>/N</u> / NI               |
| <b>Questions relating to baseline and time-varying confounding</b>                                                                                           |         |                                                                       |
| 1.7. Did the authors use an appropriate analysis method that controlled for all the important confounding domains and for time-varying confounding?          | N       | NA / <u>Y</u> / <u>PY</u> / <u>PN</u><br>/ N / NI                     |
| 1.8. <b>If <u>Y/PY</u> to 1.7:</b> Were confounding domains that were controlled for measured validly and reliably by the variables available in this study? |         | NA / <u>Y</u> / <u>PY</u> / <u>PN</u><br>/ N / NI                     |
| <b>Risk of bias judgement</b>                                                                                                                                | Serious | Low / Moderate<br>/ Serious /<br>Critical / NI                        |
| Optional: What is the predicted direction of bias due to confounding?                                                                                        |         | Favours<br>experimental /<br>Favours<br>comparator /<br>Unpredictable |

**Bias in selection of participants into the study**

|                                                                                                                                                                                                                                                                                                                                                                                                                                                                                                                        |            |                                                                                                                                         |
|------------------------------------------------------------------------------------------------------------------------------------------------------------------------------------------------------------------------------------------------------------------------------------------------------------------------------------------------------------------------------------------------------------------------------------------------------------------------------------------------------------------------|------------|-----------------------------------------------------------------------------------------------------------------------------------------|
| <p>2.1. Was selection of participants into the study (or into the analysis) based on participant characteristics observed after the start of intervention?</p> <p><b>If N/PN to 2.1:</b> go to 2.4</p> <p>2.2. <b>If Y/PY to 2.1:</b> Were the post-intervention variables that influenced selection likely to be associated with intervention?</p> <p>2.3 <b>If Y/PY to 2.2:</b> Were the post-intervention variables that influenced selection likely to be influenced by the outcome or a cause of the outcome?</p> | <p>N</p>   | <p>Y / PY / <u>PN</u> / <u>N</u> / NI</p> <p>NA / Y / PY / <u>PN</u> / <u>N</u> / NI</p> <p>NA / Y / PY / <u>PN</u> / <u>N</u> / NI</p> |
| <p>2.4. Do start of follow-up and start of intervention coincide for most participants?</p>                                                                                                                                                                                                                                                                                                                                                                                                                            | <p>Y</p>   | <p><u>Y</u> / PY / PN / N / NI</p>                                                                                                      |
| <p>2.5. <b>If Y/PY to 2.2 and 2.3, or N/PN to 2.4:</b> Were adjustment techniques used that are likely to correct for the presence of selection biases?</p>                                                                                                                                                                                                                                                                                                                                                            |            | <p>NA / <u>Y</u> / PY / PN / N / NI</p>                                                                                                 |
| <p><b>Risk of bias judgement</b></p>                                                                                                                                                                                                                                                                                                                                                                                                                                                                                   | <p>Low</p> | <p>Low / Moderate / Serious / Critical / NI</p>                                                                                         |
| <p>Optional: What is the predicted direction of bias due to selection of participants into the study?</p>                                                                                                                                                                                                                                                                                                                                                                                                              |            | <p>Favours experimental / Favours comparator / Towards null / Away from null / Unpredictable</p>                                        |



**Bias in classification of interventions**

|                                                                                                                        |                 |                                                                                           |
|------------------------------------------------------------------------------------------------------------------------|-----------------|-------------------------------------------------------------------------------------------|
| 3.1 Were intervention groups clearly defined?                                                                          | Y               | Y / PY / PN / N / NI                                                                      |
| 3.2 Was the information used to define intervention groups recorded at the start of the intervention?                  | Y               | Y / PY / PN / N / NI                                                                      |
| 3.3 Could classification of intervention status have been affected by knowledge of the outcome or risk of the outcome? | N               | Y / PY / PN / N / NI                                                                      |
| <b>Risk of bias judgement</b>                                                                                          | Low to moderate | Low / Moderate / Serious / Critical / NI                                                  |
| Optional: What is the predicted direction of bias due to classification of interventions?                              |                 | Favours experimental / Favours comparator / Towards null / Away from null / Unpredictable |

**Bias due to missing data**

|                                                                                                                                                 |     |                                                                                           |
|-------------------------------------------------------------------------------------------------------------------------------------------------|-----|-------------------------------------------------------------------------------------------|
| 5.1 Were outcome data available for all, or nearly all, participants?                                                                           | Y   | <u>Y / PY</u> / PN / N / NI                                                               |
| 5.2 Were participants excluded due to missing data on intervention status?                                                                      | N   | Y / PY / <u>PN / N</u> / NI                                                               |
| 5.3 Were participants excluded due to missing data on other variables needed for the analysis?                                                  | PN  | Y / PY / <u>PN / N</u> / NI                                                               |
| 5.4 <b>If PN/N to 5.1, or Y/PY to 5.2 or 5.3:</b> Are the proportion of participants and reasons for missing data similar across interventions? |     | NA / <u>Y / PY</u> / PN / N / NI                                                          |
| 5.5 <b>If PN/N to 5.1, or Y/PY to 5.2 or 5.3:</b> Is there evidence that results were robust to the presence of missing data?                   |     | NA / <u>Y / PY</u> / PN / N / NI                                                          |
| <b>Risk of bias judgement</b>                                                                                                                   | Low | Low / Moderate / Serious / Critical / NI                                                  |
| Optional: What is the predicted direction of bias due to missing data?                                                                          |     | Favours experimental / Favours comparator / Towards null / Away from null / Unpredictable |

**Bias in measurement of outcomes**

|                                                                                                |                 |                                                                                           |
|------------------------------------------------------------------------------------------------|-----------------|-------------------------------------------------------------------------------------------|
| 6.1 Could the outcome measure have been influenced by knowledge of the intervention received?  | N               | Y / PY / <u>PN / N</u> / NI                                                               |
| 6.2 Were outcome assessors aware of the intervention received by study participants?           | NI              | Y / PY / <u>PN / N</u> / NI                                                               |
| 6.3 Were the methods of outcome assessment comparable across intervention groups?              | PY              | <u>Y / PY</u> / PN / N / NI                                                               |
| 6.4 Were any systematic errors in measurement of the outcome related to intervention received? | N               | Y / PY / <u>PN / N</u> / NI                                                               |
| <b>Risk of bias judgement</b>                                                                  | Low to Moderate | Low / Moderate / Serious / Critical / NI                                                  |
| Optional: What is the predicted direction of bias due to measurement of outcomes?              |                 | Favours experimental / Favours comparator / Towards null / Away from null / Unpredictable |

**Bias in selection of the reported result**

|                                                                                             |                 |                                                                                           |
|---------------------------------------------------------------------------------------------|-----------------|-------------------------------------------------------------------------------------------|
| Is the reported effect estimate likely to be selected, on the basis of the results, from... |                 |                                                                                           |
| 7.1. ... multiple outcome <i>measurements</i> within the outcome domain?                    | N               | Y / PY / <u>PN</u> / <u>N</u> / NI                                                        |
| 7.2 ... multiple <i>analyses</i> of the intervention-outcome relationship?                  | PN              | Y / PY / <u>PN</u> / <u>N</u> / NI                                                        |
| 7.3 ... different <i>subgroups</i> ?                                                        | NI              | Y / PY / <u>PN</u> / <u>N</u> / NI                                                        |
| <b>Risk of bias judgement</b>                                                               | Low to moderate | Low / Moderate / Serious / Critical / NI                                                  |
| Optional: What is the predicted direction of bias due to selection of the reported result?  |                 | Favours experimental / Favours comparator / Towards null / Away from null / Unpredictable |

**Overall bias**

|                                                                             |          |                                                                                                            |
|-----------------------------------------------------------------------------|----------|------------------------------------------------------------------------------------------------------------|
| <b>Risk of bias judgement</b>                                               | Moderate | Low / Moderate<br>/ Serious /<br>Critical / NI                                                             |
| Optional: What is the overall predicted direction of bias for this outcome? |          | Favours<br>experimental /<br>Favours<br>comparator /<br>Towards null<br>/Away from null<br>/ Unpredictable |
